1 **Variation in Nutritional Composition of Anatomical Parts and Taxonomic Classes of**  
2 **Wild Animals: A Systematic Review Using Data Imputation with Artificial Intelligence**

3 Short title: Nutritional Composition of Wildmeat: A Systematic Review.

4 Ana Luisa dos Santos Medeiros<sup>a</sup>, Amanda Letícia Bezerra de Oliveira<sup>b</sup>, Maria Fernanda  
5 Araújo de Medeiros<sup>c</sup>, Daniel Tregidgo<sup>d</sup>, Eliana Bistriche Giuntini<sup>e</sup>, Elias Jacob de Menezes  
6 Neto<sup>f</sup>, Juliana Kelly da Silva Maia<sup>g</sup>, Michelle Cristine Medeiros Jacob<sup>h</sup>

7 <sup>a</sup> *Universidade Federal do Rio Grande do Norte, Avenida Senador Salgado Filho, s/n, Natal,*  
8 *RN, Brazil, 59078-970, [nutri.analuisa97@gmail.com](mailto:nutri.analuisa97@gmail.com), ORCID: 0009-0003-3238-5240*

9 <sup>b</sup> *Universidade Federal do Rio Grande do Norte, Avenida Senador Salgado Filho, s/n, Natal,*  
10 *RN, Brazil, 59078-970, [amanda.Oliveira.102@ufrn.edu.br](mailto:amanda.Oliveira.102@ufrn.edu.br), ORCID: [0009-0008-5356-5810](https://orcid.org/0009-0008-5356-5810)*

11 <sup>c</sup> *Universidade Federal do Rio Grande do Norte, Avenida Senador Salgado Filho, s/n, Natal,*  
12 *RN, Brazil, 59078-970, [maria.fernanda.059@ufrn.edu.br](mailto:maria.fernanda.059@ufrn.edu.br), ORCID: 0000-0001-7674-9307*

13 <sup>d</sup> *Grupo de Pesquisa em Ecologia de Vertebrados Terrestres, Instituto de Desenvolvimento*  
14 *Sustentável Mamirauá, Tefé, Amazonas, Brazil, [dantregidgo@gmail.com](mailto:dantregidgo@gmail.com), ORCID: 0000-*  
15 *0002-5468-831X*

16 <sup>e</sup> *Food Research Center ((FoRC) -Universidade de São Paulo / USP, São Paulo, Brazil,*  
17 *[elibi@alumni.usp.br](mailto:elibi@alumni.usp.br), ORCID: 0000-0002-8386-5418*

18 <sup>f</sup> *Metropole Digital Institute, Universidade Federal do Rio Grande do Norte, Avenida*  
19 *Senador Salgado Filho, s/n, Natal, RN, Brazil, 59078-970, [elias.jacob@ufrn.br](mailto:elias.jacob@ufrn.br), ORCID:*  
20 *0000-0002-1153-8899*

21 *§Programa de Pós-graduação em Nutrição / UFRN, Universidade Federal do Rio Grande do*  
22 *Norte, Avenida Senador Salgado Filho, s/n, Natal, RN, Brazil, 59078-970,*  
23 *juliana.maia@ufrn.br, ORCID:0000-0002-7970-534X*

24 *<sup>h</sup>Laboratory of Biodiversity and Nutrition, Universidade Federal do Rio Grande do Norte,*  
25 *Avenida Senador Salgado Filho, s/n, Natal, RN, Brazil, 59078-970, [michelle.jacob@ufrn.br](mailto:michelle.jacob@ufrn.br),*  
26 *ORCID: [0000-0002-4881-7285](https://orcid.org/0000-0002-4881-7285), corresponding author*

27

28

## 29 **ABSTRACT**

30 Wildmeat is crucial for the food security of Indigenous Peoples and Local Communities,  
31 yet information about its nutritional profile remains scarce. This study systematically  
32 reviewed the impact of anatomical part and taxonomic class (mammals, birds, reptiles)  
33 on the nutritional composition of wildmeat. Using the PRISMA protocol, we selected  
34 articles from Web of Science, Scopus, and Medline/PubMed databases, with criteria  
35 including original articles on wild animal meat composition consumed by humans,  
36 excluding studies presenting secondary data or lacking detailed methodologies. We  
37 employed a quality questionnaire and concordance analysis (Fleiss' Kappa = 1.00) for  
38 robustness. Artificial intelligence techniques (eg., K-Nearest Neighbors) estimated  
39 missing nutritional values in all 21 articles included in our study, covering 26 species and  
40 10 nutrients. Results show statistically significant nutritional variations between  
41 anatomical parts and animal classes. Reptile viscera have over twice the fat content and  
42 triple the iron compared to muscles. Mammal viscera contain five times more omega-6  
43 and selenium, four times more iron and manganese, and almost double the zinc compared  
44 to muscles. Among classes, bird muscles have over 90% higher fat content than mammal

45 muscles and 20% higher than reptile muscles. Mammals have over 100% higher zinc  
46 levels than birds, and reptiles have over 400% more selenium than birds. No significant  
47 difference in iron content between mammals and birds was noted, likely due to bird  
48 slaughter methods. This study highlights the importance of wildmeat for food security.  
49 Importantly, we demonstrate an enormous variation in nutritional composition,  
50 underscoring how different anatomical parts and taxonomic classes can contribute to  
51 tackling different nutritional deficiencies. Additionally, it introduces a novel  
52 methodology for handling missing nutritional composition data, providing a  
53 comprehensive approach to understanding the nutritional value of wildmeat. Our findings  
54 can inform food security policies and wildlife management, balancing conservation and  
55 subsistence.

56 Keywords: Wildmeat, Nutritional Composition, Food Security, Artificial Intelligence,  
57 Data Imputation, Systematic Review

## 58 **1. INTRODUCTION**

59 Meat, as a fundamental component of human diets, stands out for its diversity and  
60 nutritional value, offering an abundant source of essential nutrients for health. In this context,  
61 meat from wild animals, known as wildmeat, bushmeat or game meat, emerges as a  
62 fundamental resource for various populations around the world, especially Indigenous Peoples  
63 and Local Communities (IPLC). In this study, we consider wildmeat to be derived from wild,  
64 non-domesticated animals, (1) particularly vertebrates, excluding insects, crustaceans, larvae,  
65 mollusks, and fish. Wildmeat is a crucial resource for ensuring food access for populations  
66 within traditional food systems (2–4). It is estimated that approximately 230 to 833 million  
67 people rely on wild animal meat as a source of protein worldwide (5). Furthermore, its  
68 consumption is associated with improved nutritional status and cognitive development (6). For

69 instance, an investigation in the Amazon region found a correlation between wildmeat  
70 consumption and children's health, showing an average increase in hemoglobin concentration  
71 of 0.25 g/dL in children from vulnerable rural areas (7). Similarly, a study in Madagascar  
72 revealed that families most reliant on wildmeat, who are also the most economically  
73 disadvantaged, have a four-fold higher likelihood of developing anemia if they lose access to  
74 wildlife (8) .

75           Despite progress in recognizing the importance of wildmeat for food security and  
76 health, significant gaps remain in understanding its nutritional composition, particularly  
77 regarding micronutrients. Few studies have specifically evaluated the nutritional composition  
78 of wild species consumed (9), and existing nutritional composition tables, such as the Brazilian  
79 Food Composition Table, (10) often do not distinguish between wild and domesticated species.  
80 Researchers frequently use food matching to estimate the nutritional composition of foods with  
81 unavailable direct data, (11) a method critical for assessing products derived from biodiversity.  
82 However, this approach may introduce inaccuracies if the data is based on domestic animals,  
83 potentially misrepresenting wild species' nutritional profiles (12).

84           Current literature provides limited and scattered data on the nutritional composition  
85 of wild animals, (9,13,14) hindering a comprehensive understanding of nutritional variations.  
86 Therefore, our systematic review aims to identify patterns in the nutritional composition of  
87 wildmeat, compiling data and applying artificial intelligence techniques to address missing  
88 values (15). This approach offers a detailed analysis of wild animal meat's nutritional profile,  
89 addressing ethical challenges in studying wild species.

90           Currently, the scientific literature presents, albeit limited, data on the nutritional  
91 composition of wild animals (9,13,14). However, this information is scattered across various  
92 articles and diverse fields of knowledge. This dispersion and scarcity of data significantly

93 hinder our comprehensive understanding of nutritional variations in wild animals. In light of  
94 this, we propose the systematic review we conducted to identify patterns in the nutritional  
95 composition of wildmeat. By compiling this data and applying artificial intelligence techniques  
96 to address missing values, (15) we provide a detailed analysis of the nutritional profile of  
97 wildmeat. This approach represents a viable strategy in the face of the ethical challenges  
98 involved in analyzing wild species, considering that our database contained many gaps due to  
99 the scarcity of data in the literature, likely caused by legal and ethical limitations in sample  
100 collection (16).

101 Different tissues, such as viscera and muscles, have distinct nutritional profiles due  
102 to their specific physiological functions (17). Additionally, animal class may determine  
103 nutritional composition variations influenced by physiological and environmental factors (2,9).  
104 In this sense, to identify nutritional patterns in wildmeat composition, we hypothesized that the  
105 anatomical part (viscera vs. muscles) and the animal class (mammals, birds, reptiles) influence  
106 meat's nutritional composition.

## 107 **2. MATERIALS AND METHODS**

108 The data used to create the *corpus* for this project were gathered through a systematic  
109 review conducted according to the Preferred Reporting Items for Systematic Reviews and  
110 Meta-Analyses (PRISMA) guidelines, [(18)] see Supplementary Material 1. The protocol for  
111 this review was not registered in advance, as the research does not directly analyze any health-  
112 related outcomes.

### 113 **2.1 Selection criteria and search**

114 To address the research question posed in this project, "How does the nutritional  
115 composition of anatomical parts and taxonomic classes of wild animals vary?", we selected  
116 articles based on the following eligibility criteria: (i) original articles published in any language,

117 with no date restrictions, that (ii) provided data on the composition of wild animal meat  
118 consumed by human populations. We also included articles recommended by experts in the  
119 field, provided they met the eligibility criteria. We excluded studies that (i) did not provide  
120 nutritional composition data of wild animals, (ii) presented secondary data, or (iii) did not detail  
121 the methodology for food composition analysis.

122 In June 2022, we conducted searches in the Web of Science, Scopus, and  
123 Medline/PubMed databases (via the National Library of Medicine). The search involved  
124 applying specific descriptors in each database. The following strategy guided the search:  
125 (BUSHMEAT OR “WILD MEAT” OR “GAME MEAT” OR “INDIGENOUS MEAT” OR  
126 “WILD ANIMALS” OR "HUNTING ANIMALS MEAT") AND (“FOOD CONSUMPTION”  
127 OR “FOOD INTAKE” OR DIETARY) AND (MICRONUTRIENT OR NUTRIENT OR  
128 NUTRITION OR “FOOD COMPOSITION” OR MINERAL).

## 129 **2.2 Study selection**

130 We used the Rayyan tool to organize records and remove duplicates identified during  
131 the search. Three authors (ALSM, MFAM, ALBO) independently screened the articles,  
132 applying the eligibility criteria. During the initial screening, titles and abstracts that did not  
133 meet the inclusion criteria were excluded. In the next stage, full-text reviews were conducted,  
134 and studies presenting secondary data, incomplete works, or not meeting the selection criteria  
135 were excluded.

136 In cases of discrepancies or uncertainties, two authors (MCMJ, JKSM) were consulted.  
137 Subsequently, potentially eligible articles were read in full. After the reading and selection  
138 process, the chosen articles were stored in the Zotero reference management software.

## 139 **2.3 Data extraction**

140 Three authors (ALSM, MFAM, ALBO) independently extracted data from the selected  
141 articles to ensure transcription accuracy. Initially, we organized article identification data and  
142 information on the method of food composition analysis used in each study to determine the  
143 comparability of the available nutritional information. Additionally, we extracted data on  
144 research variables of interest, namely: taxonomy, animal class, analyzed part, and levels of  
145 macronutrients and micronutrients.

146 The nutrients analyzed, given the scope of the study (e.g., excluding heavy metal  
147 analysis) and data availability, include the following: iron, selenium, zinc, potassium,  
148 magnesium, manganese, sodium, proteins, fat, and omega-6. Nutritional composition data were  
149 converted into grams per 100 grams, and all levels were standardized on a wet weight basis.  
150 Articles presenting data on a dry weight basis were individually converted and calculated using  
151 moisture information described in the methodology of the respective articles. It is noteworthy  
152 to mention that we did not have access to the raw data from the original analyses conducted by  
153 the authors of the papers reviewed, as this information was not provided.

#### 154 **2.4 Quality analysis**

155 To date, there are no specific quality questionnaires for research on the nutritional  
156 composition of wild animals in the scientific literature. Creating such a tool is essential,  
157 considering the ethical and legal complexities associated with studying wildmeat (19). These  
158 complexities include the use of opportunistic sampling and the need for rigorous control over  
159 potential conflicts of interest in the studies analyzed. To address this gap, we developed a  
160 quality questionnaire aimed at assessing the methodological robustness of these studies.

161 The assessment tool consisted of a checklist with nine items. The development of this  
162 instrument followed an integrative approach, incorporating elements from existing protocols  
163 such as LatinFoods/FAO, "QUADAS Tool/Timmer's Analysis Tool," OHAT, Cochrane,

164 QUADAS, Timmers, and STROBE, and adapting them to meet the specific needs of our  
165 research. For each item, we crafted a corresponding question that a well-reported study should  
166 address, covering aspects such as objectives, sample size, study design, methods, results,  
167 statistical analysis, funding sources, conflicts of interest, and incomplete data. Structured  
168 responses and scoring were developed for each question: 0 points indicate that information is  
169 not available, 0.5 points denote ambiguity or unclear information, and 1.0 point signifies that  
170 the information is clearly presented or not applicable (see Supplementary Material 2).

171 The tool was tested by three trained evaluators (ALSM, MFAM, and ALBO), who used  
172 the instrument to independently assess the quality of an article. Subsequently, the results from  
173 each evaluator were discussed with the research team to refine the clarity of the instrument.  
174 With the tool finalized, three trained evaluators independently assessed the articles using the  
175 checklist. The checklist data were computed individually, and an average score was calculated  
176 from the evaluators' assessments. The agreement between the results was measured using Fleiss'  
177 Kappa. Articles were classified as low quality if they received between 0 to 2.9 points, medium  
178 quality if they received between 3.0 to 5.9 points, and high quality if they received more than  
179 6.0 points.

## 180 **2.5 Data preparation**

181 Table 1 lists the amount of missing data for each nutrient column, considering the total  
182 of 76 observations in the dataset.

183 **Table 1.** Overview of available and missing data for each nutrient analyzed

| <b>Nutrients</b> | <b>Fe</b> | <b>Mn</b> | <b>Se</b> | <b>Zn</b> | <b>K</b> | <b>Mg</b> | <b>Na</b> | <b>Protein</b> | <b>Fat</b> | <b>w6</b> |
|------------------|-----------|-----------|-----------|-----------|----------|-----------|-----------|----------------|------------|-----------|
| <b>Missing</b>   | 51        | 54        | 63        | 46        | 61       | 61        | 63        | 22             | 26         | 57        |



|                  |    |    |    |    |    |    |    |    |    |    |
|------------------|----|----|----|----|----|----|----|----|----|----|
| <b>Available</b> | 25 | 22 | 13 | 30 | 15 | 15 | 13 | 54 | 50 | 19 |
| <b>Total</b>     | 76 | 76 | 76 | 76 | 76 | 76 | 76 | 76 | 76 | 76 |

184

185 To address these gaps, we used machine learning to impute missing data. The goal  
186 is to frame each missing value as a regression problem, estimating missing values to minimize  
187 their impact on analysis results. This method expands the use of the original data, by allowing  
188 its use on modeling steps that would not be possible with the missing value (20,21).

189 Generally, there are three main types of missing data: Missing Completely at  
190 Random (MCAR), Missing at Random (MAR), and Missing Not at Random (MNAR). MCAR  
191 denotes cases where the probability of a value being missing does not depend on the data itself  
192 or any other observed variables. In contrast, MAR means that the probability of missingness is  
193 related to other observed attributes. Finally, MNAR arises when the probability of a value being  
194 missing is explicitly dependent on the missing value itself (22).

195 In the context of our dataset, we consider the absence of values in the nutritional  
196 data as Missing Completely at Random (MCAR), indicating that the missing data are unrelated  
197 to the dataset itself. This assumption seems reasonable, as our literature review revealed that  
198 the scarcity of data is primarily attributed to the limited availability of studies on game meat  
199 analysis. This is likely justified by the legal and ethical limitations in collecting samples (16),  
200 rather than any specific bias or underlying structural cause. The missing values are likely a  
201 result of general research limitations such as funding constraints or legal and ethical constraints  
202 on sample collection. We tested several methods to impute our data, including:

203                   1. *Multiple Imputation by Chained Equations* (MICE): This method  
204 operates iteratively, imputing missing values with estimates derived from regression  
205 models using observed data.

206                   2. *K-Nearest Neighbors* (KNN): This technique estimates missing values  
207 based on the average of the k nearest neighbors, considering the distance between  
208 variables in the dataset.

209                   3. *Soft Impute*: In this approach, missing values are estimated through a  
210 low-rank matrix approximation using a soft thresholding algorithm.

211                   4. *Matrix Factorization*: This technique decomposes the matrix into low-  
212 dimensional components, which are then used to approximate missing values within the  
213 matrix.

214                   5. *Nuclear Norm Minimization*: This method involves minimizing the  
215 nuclear norm of the matrix, resulting in a low-rank approximation of the original matrix  
216 with complete data.

217                   6. *Iterative Singular Value Decomposition* (SVD): In this approach, an  
218 iterative algorithm is employed to estimate missing values, progressively refining the  
219 approximation using SVD.

220           We evaluated the best technique among these mentioned using a cross-validation  
221 approach for data imputation methods. This approach involves intentionally removing known  
222 values from the dataset, treating them as missing, and then attempting to impute them using  
223 various techniques. It is important to note that our imputation process considered the entire  
224 dataset, not just individual columns. For example, when imputing missing values in the iron  
225 (Fe) column, the process took into account all available data across all nutrient columns. This

226 multivariate approach allows the imputation methods to leverage relationships and patterns  
227 between different nutrients, potentially improving the accuracy of the estimates. This way we  
228 can capture complex interactions between nutrients that might be missed if we only looked at  
229 each nutrient in isolation. This process allows us to compare the performance of each  
230 imputation method by estimating the reliability of the imputed values against the actual known  
231 values. The steps to execute this evaluation method are as follows:

- 232 1. Selecting a known value from the dataset and masking it, treating it as a missing value.
- 233 2. Apply each imputation technique separately to estimate the masked value.
- 234 3. Store the imputed values obtained from each method for further analyses.
- 235 4. Repeat steps 1-3 for all available values in all columns of the dataset.
- 236 5. Once the imputation process is complete for all values and methods, calculate the  
237 chosen evaluation metrics by comparing the original values with those imputed using  
238 each of the different imputation methods.

239 For the final step, the assessment of imputation, we used three main metrics:  
240 Symmetric Mean Absolute Percentage Error (SMAPE) and Mean Absolute Error (MAE). MAE  
241 is useful for assessing the overall performance of the imputation technique, providing a  
242 measure of how closely imputed values approximate the actual values. SMAPE quantifies the  
243 relative accuracy between observed and imputed values by calculating the average of absolute  
244 differences normalized by the average absolute values, subsequently expressed as a percentage.  
245 The formula for SMAPE is as follows:

$$246 \quad SMAPE = \frac{1}{n} \sum_{i=1}^n \frac{|y_i - \hat{y}_i|}{(|y_i| + |\hat{y}_i|)} \times 100\%$$

247 Where:

- 248 •  $y_i$  is the actual value of the variable

- 249 •  $\hat{y}_i$  is the predicted value of the variable
- 250 •  $n$  is the number of observations

251 Finally, the MAE (Mean Absolute Error) calculates the average of the absolute  
252 differences between observed and imputed values, providing a direct and interpretable  
253 representation of the average error magnitude. The formula for MAE is given by:

254

$$255 \quad MAE = \frac{1}{n} \sum_{i=1}^n |y_i - \hat{y}_i|$$

256 In summary, our methodology includes a thorough analysis of missing data  
257 characteristics. We classified the pattern of absence and employed a systematic execution of  
258 multiple imputation techniques to address the limitation caused by missing values. The scarcity  
259 of nutritional information for wildmeat, identified in our literature review, presents a  
260 compelling case to treat missing nutrition data as MCAR. This assumption allows for the use  
261 of imputation methods, which, as shown in previous research, can enhance the accuracy and  
262 reliability of estimates derived from incomplete datasets.

263 All data imputation analyses were conducted using the Python programming  
264 language. Upon completion of the imputation process, nutrient values were expressed in units  
265 of measure as per the Dietary Reference Intakes. [(23)] The code required to replicate our results  
266 is publicly available on GitHub. [(24)]

## 267 **2.6 Variables related to hypothesis testing**

268 The nutritional composition data of 10 nutrients served as our dependent variable. For  
269 hypothesis 1, where we tested the influence of the anatomical part on nutritional composition,

270 the independent variables were muscle and viscera. For hypothesis 2, the independent variables  
271 were the animal classes: mammals, birds, and reptiles.

272 We recognize that factors such as animal anatomy (25) cause of death, (13) geographical  
273 location and seasonality, (26,27) physical activity level, (28) and physiological and metabolic  
274 characteristics (9) can affect meat's nutritional composition. However, we lack access to these  
275 data for our research because they are inconsistently reported in the analyzed studies and are  
276 only occasionally mentioned when investigating these specific influences.

## 277 **2.7 Data Analysis**

278 We used descriptive statistics to summarize our findings and assessed the normality  
279 of numerical data using the Shapiro test. Based on the data characteristics, we conducted either  
280 ANOVA or Kruskal-Wallis tests, setting a significance level of 0.05 (p-value) to determine the  
281 significance of the results. In cases of significant differences, we performed post hoc tests such  
282 as Tukey or Bonferroni. All statistical analyses were conducted using the R programming  
283 language through the RStudio interface.

## 284 **3. RESULTS**

### 285 **3.1 Study Selection**

286 After searching the database, we obtained a total of 565 articles (Web of Science:  
287 68, Medline/PubMed: 325, Scopus: 172). After excluding 142 duplicates, 423 articles  
288 proceeded to title and abstract screening. Following this step, we selected 75 articles for full-  
289 text review. At this stage, 62 articles were excluded for presenting secondary data (5 articles),  
290 being incomplete (56 articles), or lacking nutrient composition data relevant to our selection (1  
291 article). Ultimately, we included 13 articles for review. Additionally, we incorporated 8 external

292 articles, recommended by experts, which met all our criteria. Therefore, a total of 21 articles  
293 constitute our study. Figure 1 illustrates the selection process and flowchart.

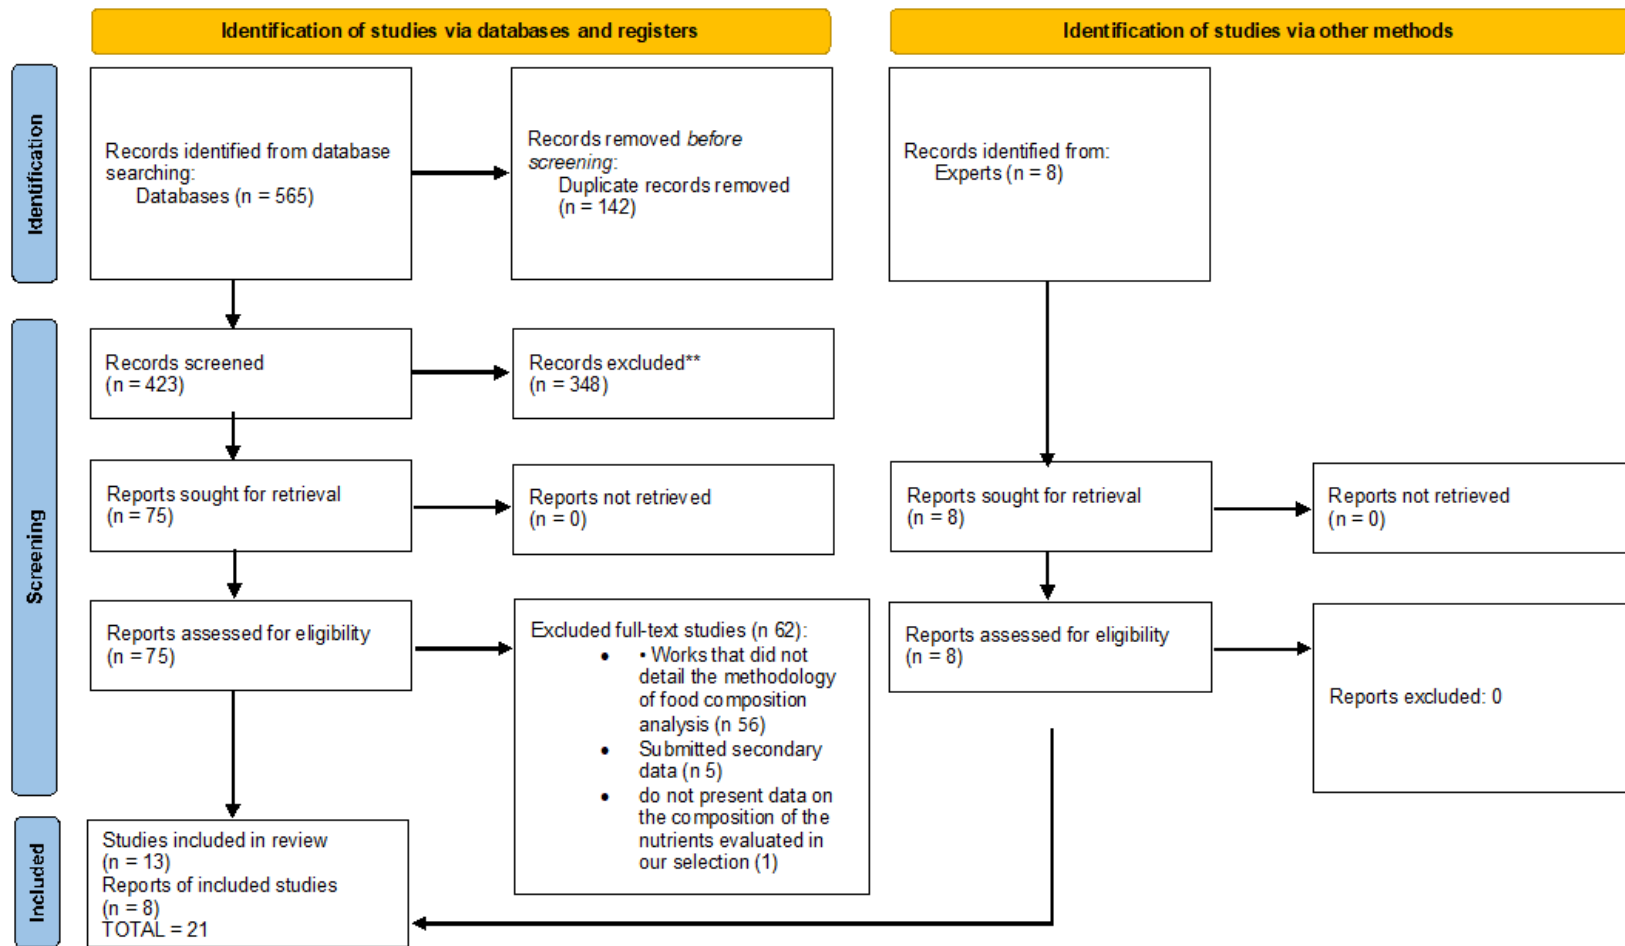

\*Consider, if feasible to do so, reporting the number of records identified from each database or register searched (rather than the total number across all databases/registers).

\*\*If automation tools were used, indicate how many records were excluded by a human and how many were excluded by automation tools.

From: Page MJ, McKenzie JE, Bossuyt PM, Boutron I, Hoffmann TC, Mulrow CD, et al. The PRISMA 2020 statement: an updated guideline for reporting systematic reviews. *BMJ* 2021;372:n71. doi: 10.1136/bmj.n71. For more information, visit: <http://www.prisma-statement.org/>

294

295 **Figure 1.** Flowchart of the study selection process.

296 **3.2. Characteristics of the studies**

297           The systematic review analyzed 26 distinct animal species, including 13 mammalian  
298 species, six bird species, and seven reptile species (see Supplementary Material 4). The studies  
299 covered sample collections from 11 countries: Italy, Germany, South Africa, Poland, the United  
300 States of America, New Zealand, Spain, Canada, Latvia, Peru, and Brazil. Italy, Spain, Poland,  
301 and South Africa were prominently featured for their recurring analyses of wildmeat. For a  
302 comprehensive understanding of the studies included in this review, Table 2 presents their main  
303 characteristics.

304 **Table 2.** Characterization of studies on the nutritional composition of wild animals. Names of  
305 animals collected are presented exactly as provided in the papers. Scientific names were  
306 updated for the analysis; for updated names, see Supplementary Material 4.



| n | Publication                                                                               | Study objective                                                                 | Key findings                                                                                                                                                                                     | Country of collection | Wild animals                                                                                                                                                                                                                                                                             | Samples                   | Analyses performed                                            | Study quality(29) |
|---|-------------------------------------------------------------------------------------------|---------------------------------------------------------------------------------|--------------------------------------------------------------------------------------------------------------------------------------------------------------------------------------------------|-----------------------|------------------------------------------------------------------------------------------------------------------------------------------------------------------------------------------------------------------------------------------------------------------------------------------|---------------------------|---------------------------------------------------------------|-------------------|
| 1 | Aguiar JPL. Tabela de composição de alimentos da Amazônia. ACTA AMAZONICA 26. 1996;121–6. | Analyze samples of wild animal meat obtained from public markets in the Amazon. | Analyses of the samples' composition were conducted. The results were compiled into a centesimal composition table, and a summary of the findings is available for consultation in this article. | Brazil                | Cabeçudo ( <i>Peltocephalus dumerilianus</i> ); catitu ( <i>Pecari tajacu</i> ); cutia ( <i>Dasyprocta leporina</i> ); Iaçá ( <i>Podocnemis sextuberculat</i> ); jacaretinga ( <i>Caiman crocodilus</i> ); paca ( <i>Agouti paca</i> ); tartaruga ( <i>Podocnemis expansa</i> ); tracajá | 31 (muscle) + 4 (viscera) | Protein: Method Kjeldahl - AOAC (1984); Lipid: Soxhlet Method | High (6.50)(30)   |

|   |                                                                                                                                                                                                                                           |                                                                                                                             |                                                                                                                                                                                                                                                                                                                |       |                                                                      |                                    |                                                                                                                     |                   |
|---|-------------------------------------------------------------------------------------------------------------------------------------------------------------------------------------------------------------------------------------------|-----------------------------------------------------------------------------------------------------------------------------|----------------------------------------------------------------------------------------------------------------------------------------------------------------------------------------------------------------------------------------------------------------------------------------------------------------|-------|----------------------------------------------------------------------|------------------------------------|---------------------------------------------------------------------------------------------------------------------|-------------------|
|   |                                                                                                                                                                                                                                           |                                                                                                                             |                                                                                                                                                                                                                                                                                                                |       | <i>(Podocnemis unifilis);</i><br><br><i>veado (Mazama americana)</i> |                                    |                                                                                                                     |                   |
| 2 | Amici A, Cifuni GF, Contò M, Esposito L, Failla S. Hunting area affects chemical and physical characteristics and fatty acid composition of wild boar ( <i>Sus scrofa</i> ) meat. Rendiconti Lincei. 1o de novembro de 2015;26(3):527–34. | To examine how different geographic hunting areas influence the chemical composition and quality indices of wild boar meat. | The characteristics of wild animal meat varied due to environmental factors, including diet. Dietary diversity appears to influence aspects of the meat, such as color parameters, cooking losses, dry matter content, protein levels, and fatty acid profiles. These differences were observed in relation to | Italy | Wild boar ( <i>Sus scrofa</i> )                                      | 48 (Longissimus thoracis - muscle) | Protein: Method Kjeldahl - AOAC (1995); Lipids: Folch et al. (1957); Lipid Fraction: Method Soxhlet - IUPAC (1992). | Medium (5.50)(31) |

|   |                                                                                                                                                                                                                                                                                                       |                                                                            |                                                                                                                                                                                                                                                                                |        |                                                                             |                              |                                                                                                                                       |             |
|---|-------------------------------------------------------------------------------------------------------------------------------------------------------------------------------------------------------------------------------------------------------------------------------------------------------|----------------------------------------------------------------------------|--------------------------------------------------------------------------------------------------------------------------------------------------------------------------------------------------------------------------------------------------------------------------------|--------|-----------------------------------------------------------------------------|------------------------------|---------------------------------------------------------------------------------------------------------------------------------------|-------------|
|   |                                                                                                                                                                                                                                                                                                       |                                                                            | the hunting area.                                                                                                                                                                                                                                                              |        |                                                                             |                              |                                                                                                                                       |             |
| 3 | Milczarek A, Janocha A, Niedziałek G, Zowczak-Romanowicz M, Horoszewicz E, Piotrowski S. Health-Promoting Properties of the Wild-Harvested Meat of Roe Deer ( <i>Capreolus capreolus</i> L.) and Red Deer ( <i>Cervus elaphus</i> L.) [Internet]. 2021 [citado 5 de setembro de 2024]. Disponível em: | Compare the proximate nutrient composition of roe deer and wild deer meat. | Regarding the macronutrient profile, no differences were observed with respect to sex, except for the fat content in females, which was higher than in males regardless of the species. As for micronutrients, the levels found are in accordance with the recommended values. | Poland | Roe deer ( <i>Capreolus capreolus</i> ), Red deer ( <i>Cervus elaphus</i> ) | 60 (semimembranosus muscles) | Protein: Kjeldahl (990.03); Lipids: Method Soxhlet (991.36); Lipid fractions: GC-FID; Methodology; Minerals: (Cd, Pb, Fe) PN-EN 14084 | High (8.33) |

|   |                                                                                                                                                                                                                                                                                  |                                                                                                                                                  |                                                                                                                                                                                                                                                                                                                                           |         |                                                                          |                          |                                                                                                                                                                      |             |
|---|----------------------------------------------------------------------------------------------------------------------------------------------------------------------------------------------------------------------------------------------------------------------------------|--------------------------------------------------------------------------------------------------------------------------------------------------|-------------------------------------------------------------------------------------------------------------------------------------------------------------------------------------------------------------------------------------------------------------------------------------------------------------------------------------------|---------|--------------------------------------------------------------------------|--------------------------|----------------------------------------------------------------------------------------------------------------------------------------------------------------------|-------------|
|   | <a href="https://www.mdpi.com/2076-2615/11/7/2108">https://www.mdpi.com/2076-2615/11/7/2108</a>                                                                                                                                                                                  |                                                                                                                                                  |                                                                                                                                                                                                                                                                                                                                           |         |                                                                          |                          |                                                                                                                                                                      |             |
| 4 | Dannenberger D, Nuernberg G, Nuernberg K, Hagemann E. The effects of gender, age and region on macro- and micronutrient contents and fatty acid profiles in the muscles of roe deer and wild boar in Mecklenburg-Western Pomerania (Germany). <i>Meat Sci.</i> 2013;94(1):39–46. | Investigate the effects of gender, age, and region on the macronutrients, micronutrients, and fatty acid profiles of wild boar and deer muscles. | The protein content in deer remained constant regardless of region, age, or sex; however, wild boar meat varied across these factors. Fat in deer varied by region, age, and sex, while in wild boar, they remained stable. Selenium and iron were not influenced by region, age, or sex, except for higher iron levels in older females. | Germany | Roe deer ( <i>Capreolus capreolus</i> ), Wild boar ( <i>Sus scrofa</i> ) | 203 (longissimus muscle) | Proteins and lipids: Meat Analyzer FoodScan™ (FOSS Analytic, Hillerod, Denmark); Lipid fractions: Gas chromatography analysis; Minerals: ICP-MS (Se, Cu, Fe, and Zn) | High (6.50) |

|           |                                                                                                                                                                                                                                                            |                                                                                                               |                                                                                                                                                                                                                                     |        |                                  |             |                                                                                                                      |                 |
|-----------|------------------------------------------------------------------------------------------------------------------------------------------------------------------------------------------------------------------------------------------------------------|---------------------------------------------------------------------------------------------------------------|-------------------------------------------------------------------------------------------------------------------------------------------------------------------------------------------------------------------------------------|--------|----------------------------------|-------------|----------------------------------------------------------------------------------------------------------------------|-----------------|
|           |                                                                                                                                                                                                                                                            |                                                                                                               | Zinc concentrations varied according to region, age, and sex.                                                                                                                                                                       |        |                                  |             |                                                                                                                      |                 |
| 5(3<br>2) | Fernandes HR, Deliza R, Neto OC, Silva CM, Albuquerque NI de, Martins TR, et al. Effect of high hydrostatic pressure on the meat of collared peccaries ( <i>Tayassu tajacu</i> ) with different ages. Afr J Food Sci. 30 de setembro de 2022;16(9):215–25. | Evaluate the effects of high hydrostatic pressure on the physicochemical parameters of collared peccary meat. | High hydrostatic pressure tenderized the meat of adult collared peccaries and influenced meat quality. The results also showed changes in the protein profiles of animals of different ages subjected to different pressure levels. | Brazil | Peccary ( <i>Pecari tajacu</i> ) | 40 (muscle) | Proteins: Method Kjeldahl - AOAC (1995); Lipids: Method Soxhlet - AOAC (1995); Lipid fraction: Bligh and Dyer (1959) | High (6.50)(33) |

|   |                                                                                                                                                                                                                                                                                                                                           |                                                                       |                                                                      |             |                                                                                                                                                          |                    |                                                                                                                                                              |                      |
|---|-------------------------------------------------------------------------------------------------------------------------------------------------------------------------------------------------------------------------------------------------------------------------------------------------------------------------------------------|-----------------------------------------------------------------------|----------------------------------------------------------------------|-------------|----------------------------------------------------------------------------------------------------------------------------------------------------------|--------------------|--------------------------------------------------------------------------------------------------------------------------------------------------------------|----------------------|
| 6 | <p>Gálvez C. H, Arbaiza T, Carcelén C. F, Lucas A. O. Revista de Investigaciones Veterinarias del Perú. 1999 [citado 5 de setembre de 2024].</p> <p>VALOR NUTRITIVO DE LAS CARNES DE SAJINO (<i>Tayassu tajacu</i>), VENADO COLORADO (<i>Mazama americana</i>), MAJAZ (<i>Agouti paca</i>) Y MOTELO (<i>Georchelone denticulata</i>).</p> | <p>Determine the nutritional characteristics of wild animal meat.</p> | <p>Wild meats exhibited high protein content and low fat levels.</p> | <p>Peru</p> | <p>Sajino (<i>Tayassu pecari</i>), Motelo (<i>Chelonoidis denticulata</i>), Majaz (<i>Cuniculus paca</i>), Venado colorado (<i>Mazama americana</i>)</p> | <p>20 (muscle)</p> | <p>Macronutrients and micronutrients</p> <p>Proteins :<br/>Method<br/>Kjeldahl -<br/>AOAC, 1990;</p> <p>Lipids:<br/>Method<br/>Soxhlet -<br/>.AOAC, 1990</p> | <p>Medium (5.50)</p> |
|---|-------------------------------------------------------------------------------------------------------------------------------------------------------------------------------------------------------------------------------------------------------------------------------------------------------------------------------------------|-----------------------------------------------------------------------|----------------------------------------------------------------------|-------------|----------------------------------------------------------------------------------------------------------------------------------------------------------|--------------------|--------------------------------------------------------------------------------------------------------------------------------------------------------------|----------------------|

|       |                                                                                                                                                                                                                                         |                                                                                                                                                                     |                                                                                                                                                                                                                                         |        |                                    |                                       |                                                                                                      |                   |
|-------|-----------------------------------------------------------------------------------------------------------------------------------------------------------------------------------------------------------------------------------------|---------------------------------------------------------------------------------------------------------------------------------------------------------------------|-----------------------------------------------------------------------------------------------------------------------------------------------------------------------------------------------------------------------------------------|--------|------------------------------------|---------------------------------------|------------------------------------------------------------------------------------------------------|-------------------|
|       | Disponível em:<br><a href="https://revistasinvestigacion.unmsm.edu.pe/index.php/veterinaria/article/view/6707">https://revistasinvestigacion.unmsm.edu.pe/index.php/veterinaria/article/view/6707</a>                                   |                                                                                                                                                                     |                                                                                                                                                                                                                                         |        |                                    |                                       |                                                                                                      |                   |
| 7(34) | Jarzyńska G, Falandysz J. Selenium and 17 other largely essential and toxic metals in muscle and organ meats of Red Deer ( <i>Cervus elaphus</i> ) — Consequences to human health. <i>Environ Int.</i> 1o de julho de 2011;37(5):882–8. | To determine the content and composition of micronutrients in red deer, relating them to meat intake rates, human nutritional needs, and associated health impacts. | The meats from muscles and organs of red deer exhibited high concentrations of copper, chromium, cobalt, manganese, selenium, and zinc. Additionally, they contained toxic trace elements such as mercury, lead, cadmium, and titanium. | Poland | Red Deer ( <i>Cervus elaphus</i> ) | 60 (20 muscle; 20 liver 20 de kidney) | Minerals: ICP-AES (Se) , ICP-MS (Ag, Ba, Cd, Co, Cr, Cs, Cu, Ga, Mn, Mo, Pb, Rb, Sb, Sr, Tl, V e Zn) | Medium (4.50)(35) |

|   |                                                                                                                                           |                                                                                              |                                                                                                                                                                                                                                                                                                                   |                          |                                    |             |                                                                                                           |                   |
|---|-------------------------------------------------------------------------------------------------------------------------------------------|----------------------------------------------------------------------------------------------|-------------------------------------------------------------------------------------------------------------------------------------------------------------------------------------------------------------------------------------------------------------------------------------------------------------------|--------------------------|------------------------------------|-------------|-----------------------------------------------------------------------------------------------------------|-------------------|
|   |                                                                                                                                           |                                                                                              | The cadmium levels found in the meats exceed tolerance limits.                                                                                                                                                                                                                                                    |                          |                                    |             |                                                                                                           |                   |
| 8 | Johnson HE, Bleich VC, Krausman PR. Mineral deficiencies in tule elk, Owens Valley, California. J Wildl Dis. janeiro de 2007;43(1):61–74. | Assess the mineral content of horn, liver and forage to measure deficiencies and toxicities. | The levels of minerals found in the liver and horn varied between animals from two different locations. It was found that antler breakage in elk at one of the locations was related to a copper and phosphorus deficiency. The levels of micronutrients found in forage varied according to location and season. | United States of America | Tule elk ( <i>Cervus elaphus</i> ) | 240 (liver) | Minerals: Flame atomic absorption spectrophotometry (Cu e Mo); ICP-MS (Ca, Fe, Mg, Mn, S, P, Zn, Cu e Mo) | Medium (5.50)(36) |



|    |                                                                                                                                                                                                           |                                                                                                                                              |                                                                                                                                                                     |        |                                                     |                            |                                                                                                 |                    |
|----|-----------------------------------------------------------------------------------------------------------------------------------------------------------------------------------------------------------|----------------------------------------------------------------------------------------------------------------------------------------------|---------------------------------------------------------------------------------------------------------------------------------------------------------------------|--------|-----------------------------------------------------|----------------------------|-------------------------------------------------------------------------------------------------|--------------------|
| 9  | <p>Lima AT.</p> <p>Caracterização Fisico Quimica da Tartaruga da Amazônia de água proveniente de cativeiro e de habitat natural do estado do Amazonas.</p> <p>Universidade Federal do Amazonas; 2009.</p> | <p>To evaluate the yield and chemical composition of <i>Podocnemis expansa</i> raised in commercial captivity and from natural habitats.</p> | <p>The meat evaluated in both systems showed a low fat content. And the free-living ones had a higher protein content.</p>                                          | Brazil | Tartaruga-da-amazônia ( <i>Podocnemis expansa</i> ) | 45 (muscle) + 15 (viscera) | <p>Proteins :<br/>Method<br/>Kjeldahl ;<br/>Lipid (Bligh e Dyer,1959)</p>                       | High<br>(8.50)(37) |
| 10 | <p>Lorenzo JM, Maggiolino A, Gallego L, Pateiro M, Serrano MP, Domínguez R, et al.</p> <p>Effect of age on nutritional properties</p>                                                                     | <p>Investigating the effects of slaughter age on the levels of macro and microminerals in wild deer meat.</p>                                | <p>Total fat and fraction contents were affected by the slaughter age, showing higher values in older animals. Regarding cholesterol, its levels decreased with</p> | Spain  | Red deer ( <i>Cervus elaphus</i> )                  | 150 (muscle)               | <p>Lipid: Bligh e Dyer; Fraction lipid analysis: Gas chromatography; Minerals: ICP-OES, Ca,</p> | High (8.50)        |

|    |                                                                                                                                                                                                                                                                                                          |                                                                   |                                                                                                    |              |                               |                                                          |                                                  |                 |
|----|----------------------------------------------------------------------------------------------------------------------------------------------------------------------------------------------------------------------------------------------------------------------------------------------------------|-------------------------------------------------------------------|----------------------------------------------------------------------------------------------------|--------------|-------------------------------|----------------------------------------------------------|--------------------------------------------------|-----------------|
|    | of Iberian wild red deer meat - Journal of the Science of Food and Agriculture [Internet]. 2019 [citado 5 de setembro de 2024]. Disponível em: <a href="https://scijournals.onlinelibrary.wiley.com/doi/abs/10.1002/jsfa.9334">https://scijournals.onlinelibrary.wiley.com/doi/abs/10.1002/jsfa.9334</a> |                                                                   | increasing slaughter age.                                                                          |              |                               |                                                          | K, Mg, Na, P, Fe, Mn, Zn e Cu.                   |                 |
| 11 | Cawthorn DM, Hoffman LC. The bushmeat and food security nexus: A global account of the                                                                                                                                                                                                                   | Determine the proximate and fatty acid composition of zebra meat. | The muscles had high protein content and low fat content. In the fat group, high concentrations of | South Africa | Zebra ( <i>Equus quagga</i> ) | 20 (longissimus lumborum muscle, longissimus thoracis et | Protein: Method Dumas - AOAC 992.15; Lipid: LEE; | High (7.33)(38) |

|    |                                                                                                                                                                           |                                                                             |                                                                                                                                                                                                                           |              |                                            |                           |                                                                                     |            |
|----|---------------------------------------------------------------------------------------------------------------------------------------------------------------------------|-----------------------------------------------------------------------------|---------------------------------------------------------------------------------------------------------------------------------------------------------------------------------------------------------------------------|--------------|--------------------------------------------|---------------------------|-------------------------------------------------------------------------------------|------------|
|    | contributions, conundrums and ethical collisions. Food Res Int. 1o de outubro de 2015;76:906–25.                                                                          |                                                                             | saturated fatty acids were found.                                                                                                                                                                                         |              |                                            | lumborum)                 | Fraction lipid analysis: Gas chromatography;                                        |            |
| 12 | Rudman M, Leslie AJ, van der Rijst M, Hoffman LC. Quality characteristics of Warthog ( <i>Phacochoerus africanus</i> ) meat. Meat Sci. 1o de novembro de 2018;145:266–72. | Evaluate the sensorial, physical and chemical attributes of wild boar meat. | Analysis of the sensory profile demonstrated that this meat has an undesirable aroma and flavor, described as sour, which was found in the meat of wild boars of all ages. Regarding macronutrient recommendations, these | South Africa | Warthogs ( <i>Phacochoerus africanus</i> ) | 31 (Longissimus lumborum) | Protein: Method Dumas - 992.15; Lipids: LEE; Ashes (AOAC, 1992; AOAC, 2002a, 2002b) | High (8.0) |

|        |                                                                                                                                                                                                                      |                                                                                                                                                      |                                                                                                                                  |        |                                              |             |                                                                              |             |
|--------|----------------------------------------------------------------------------------------------------------------------------------------------------------------------------------------------------------------------|------------------------------------------------------------------------------------------------------------------------------------------------------|----------------------------------------------------------------------------------------------------------------------------------|--------|----------------------------------------------|-------------|------------------------------------------------------------------------------|-------------|
|        |                                                                                                                                                                                                                      |                                                                                                                                                      | meats were considered healthy sources of protein and polyunsaturated fatty acids.                                                |        |                                              |             |                                                                              |             |
| 13(39) | Neto JV, Bressan MC, Faria PB, Vieira JO e, Santana MTA, Kloster M.<br>Composição centesimal e colesterol da carne de jacaré-do-pantanal (Caiman yacare Daudin 1802) oriundo de zoológico e habitat natural. Ciênc E | Determine the proximate composition and cholesterol of meat from the tail and back of alligators, from zoo breeding facilities and natural habitats. | Animals bred in captivity had a lower amount of fat and higher protein levels when compared to animals in their natural habitat. | Brazil | Alligator-swampland ( <i>Caiman yacare</i> ) | 12 (muscle) | Proteins : Method Kjeldahl - AOAC,1990; Lipids: Method Soxhlet - AOAC, 1990. | High (8.50) |

|    |                                                                                                                                                                                                                                                        |                                                                     |                                                                                                                                                     |       |                                                    |                                                      |                                                                                                                    |                    |
|----|--------------------------------------------------------------------------------------------------------------------------------------------------------------------------------------------------------------------------------------------------------|---------------------------------------------------------------------|-----------------------------------------------------------------------------------------------------------------------------------------------------|-------|----------------------------------------------------|------------------------------------------------------|--------------------------------------------------------------------------------------------------------------------|--------------------|
|    | Agrotecnologia.<br>agosto de<br>2006;30:701–6.                                                                                                                                                                                                         |                                                                     |                                                                                                                                                     |       |                                                    |                                                      |                                                                                                                    |                    |
| 14 | Landi N, Ragucci S,<br>Di Giuseppe AM,<br>Russo R, Poerio E,<br>Severino V, et al.<br>Nutritional profiling of<br>Eurasian woodcock<br>meat: chemical<br>composition and<br>myoglobin<br>characterization. J Sci<br>Food Agric.<br>2018;98(13):5120–8. | Evaluate the<br>nutritional aspects<br>of Eurasian chicken<br>meat. | Urian chicken meat<br>contains high<br>concentrations of high-<br>quality proteins, due to<br>its amino acid<br>composition and low fat<br>content. | Italy | Eurasian woodcock<br>( <i>Scolopax rusticola</i> ) | 10 (entire chest<br>and leg muscle,<br>without skin) | Proteins :<br>Method<br>Kjeldahl;<br>lipids: Method<br>Soxhlet -<br>AOAC 991.36;<br>Lipid<br>fractions: GC-<br>FID | High<br>(7.00)(41) |

|    |                                                                                                                                                                                                          |                                                                                                                                     |                                                                                                                                                                                                      |      |                                                                                                        |             |                                                                                                                              |                 |
|----|----------------------------------------------------------------------------------------------------------------------------------------------------------------------------------------------------------|-------------------------------------------------------------------------------------------------------------------------------------|------------------------------------------------------------------------------------------------------------------------------------------------------------------------------------------------------|------|--------------------------------------------------------------------------------------------------------|-------------|------------------------------------------------------------------------------------------------------------------------------|-----------------|
|    | (40)                                                                                                                                                                                                     |                                                                                                                                     |                                                                                                                                                                                                      |      |                                                                                                        |             |                                                                                                                              |                 |
| 15 | Pérez-Peña PE, Riveros-Montalván MS, Vargas-Arana G, Soria FD, Chumbe JV, Baca YB. Consumo, microbiología y bromatología de la carne silvestre durante la COVID-19 en Iquitos, Perú. Cienc Amaz Iquitos. | Know the microbiological and bromatological status of bush meat during the COVID-19 pandemic from two public markets in the Amazon. | Game meat had a low fat content and a high percentage of protein. The calcium content found in wild meat was higher than in domesticated meat. Phosphorus content was also significant in wild meat. | Peru | <i>Pecari tajacu</i> , <i>Tayassu pecari</i> , <i>Cuniculus paca</i> , <i>Chelonoidis denticulatus</i> | 16 (muscle) | Protein:Kjeldahl; Fat: Soxhlet; Vitamins: Chromatography high pressure liquid (HPLC); Minerals: (zinc, sodium, potassium and | High (6.50)(26) |

|    |                                                                                                                                                                                                      |                                                                                                                                                        |                                                                                                                                                                                                                            |                             |                                        |                                             |                                                                                                              |            |
|----|------------------------------------------------------------------------------------------------------------------------------------------------------------------------------------------------------|--------------------------------------------------------------------------------------------------------------------------------------------------------|----------------------------------------------------------------------------------------------------------------------------------------------------------------------------------------------------------------------------|-----------------------------|----------------------------------------|---------------------------------------------|--------------------------------------------------------------------------------------------------------------|------------|
|    | 2021;9(2):51–68.                                                                                                                                                                                     |                                                                                                                                                        |                                                                                                                                                                                                                            |                             |                                        |                                             | iron) by<br>Absorption<br>Spectroscopy<br>Atomic (EAA)<br>and<br>Phosphorus by<br>UV Visible<br>Spectroscopy |            |
| 16 | Serrano MP,<br>Maggiolino A,<br>Landete-Castillejos T,<br>Pateiro M, Barbería<br>JP, Fierro Y, et al.<br>Quality of main types<br>of hunted red deer<br>meat obtained in Spain<br>compared to farmed | Assess the<br>combined impact of<br>country of origin<br>and type of<br>slaughter and season<br>on the quality and<br>nutritional value of<br>venison. | Wild deer from Spain<br>had a higher protein<br>concentration than meat<br>from animals raised in<br>New Zealand. The<br>calcium, sodium and<br>phosphorus levels found<br>in meat do not differ<br>between countries. New | Spain and<br>New<br>Zealand | Red deer ( <i>Cervus<br/>elaphus</i> ) | 24 (Longissimus<br>thoracis et<br>lumborum) | Lipids: LEE;<br>Protein:<br>DUMAS                                                                            | High (9.0) |

|  |                                                                            |  |                                                                                                                                                                                                                                                                                                                                                                         |  |  |  |  |  |
|--|----------------------------------------------------------------------------|--|-------------------------------------------------------------------------------------------------------------------------------------------------------------------------------------------------------------------------------------------------------------------------------------------------------------------------------------------------------------------------|--|--|--|--|--|
|  | <p>venison from New Zealand. Sci Rep. 22 de julho de 2020;10(1):12157.</p> |  | <p>Zealand farm deer had higher concentrations of magnesium, iron, manganese, copper and lower concentrations of zinc when compared to wild deer from Spain. The nutrient profile of meats also varied depending on the season. Meat from winter hunts had higher levels of calcium, sodium, iron and zinc and lower levels of magnesium and phosphorus compared to</p> |  |  |  |  |  |
|--|----------------------------------------------------------------------------|--|-------------------------------------------------------------------------------------------------------------------------------------------------------------------------------------------------------------------------------------------------------------------------------------------------------------------------------------------------------------------------|--|--|--|--|--|



|    |                                                                                                                                                                                                                   |                                                                        |                                                                                                                                                                                                                                                              |       |                                                                                                                               |                    |                                                                                                                                              |             |
|----|-------------------------------------------------------------------------------------------------------------------------------------------------------------------------------------------------------------------|------------------------------------------------------------------------|--------------------------------------------------------------------------------------------------------------------------------------------------------------------------------------------------------------------------------------------------------------|-------|-------------------------------------------------------------------------------------------------------------------------------|--------------------|----------------------------------------------------------------------------------------------------------------------------------------------|-------------|
|    |                                                                                                                                                                                                                   |                                                                        | meat from summer hunts.                                                                                                                                                                                                                                      |       |                                                                                                                               |                    |                                                                                                                                              |             |
| 17 | Sevillano-Caño J, Cámara-Martos F, Aguilar-Luque EM, Cejudo-Gómez M, Moreno-Ortega A, Sevillano-Morales JS. Trace Element Concentrations in Migratory Game Bird Meat: Contribution to Reference Intakes Through a | Determine the nutritional and toxicological content of game bird meat. | Iron and chromium contents were similar in all three bird species studied. Meat from thrush had the highest concentrations of copper. Pigeons and doves had the highest concentrations of zinc. The study concluded that the meat of migratory game birds is | Spain | Woodpigeon ( <i>Columba palumbus</i> ), Common turtledove ( <i>Streptopelia turtur</i> ), Thrush ( <i>Turdus philomelos</i> ) | 89 (breast; thigh) | Cu, Fe, Zn: flame atomic absorption spectroscopy (FAAS, Varian SpectraAA – model 50B); Cr, Co: Electrothermal Atomic Absorption Spectrometry | High (6.50) |

|    |                                                                                                                                                                                 |                                                                                    |                                                                                                                                 |        |                                                                                                                     |             |                                                                                                                              |             |
|----|---------------------------------------------------------------------------------------------------------------------------------------------------------------------------------|------------------------------------------------------------------------------------|---------------------------------------------------------------------------------------------------------------------------------|--------|---------------------------------------------------------------------------------------------------------------------|-------------|------------------------------------------------------------------------------------------------------------------------------|-------------|
|    | Probabilistic Assessment. Biol Trace Elem Res. 1o de outubro de 2020;197(2):651–9.                                                                                              |                                                                                    | an excellent dietary source of copper and iron, much better than other types of meat, such as non-wild birds and even red meat. |        |                                                                                                                     |             | on an Agilent Model 240Z AA                                                                                                  |             |
| 18 | Spiegelaar N, Martin ID, Tsuji LJS. Indigenous Subarctic Food Systems in Transition: Amino Acid Composition (Including Tryptophan) in Wild-Harvested and Processed Meats. Int J | Determine the amino acid and protein composition of wild meats and processed meats | The wild meats analyzed showed high concentrations of proteins and amino acids.                                                 | Canada | Moose ( <i>Alces alces</i> ), Canada Goose ( <i>Branta canadensis</i> ), Mallard Duck ( <i>Anas platyrhynchos</i> ) | 25 (muscle) | Proteins : Method Kjeldahl - AOAC 981.10; Amino acids: standardized hydrolysis of NaOH and HCl, and ultra-performance liquid | High (7.50) |

|        |                                                                                                                                                                  |                                                                                                                   |                                                                                                                                                                                                      |        |                                                                                                                                      |             |                                                                                                                           |                      |
|--------|------------------------------------------------------------------------------------------------------------------------------------------------------------------|-------------------------------------------------------------------------------------------------------------------|------------------------------------------------------------------------------------------------------------------------------------------------------------------------------------------------------|--------|--------------------------------------------------------------------------------------------------------------------------------------|-------------|---------------------------------------------------------------------------------------------------------------------------|----------------------|
|        | Food Sci. 27 de junho<br>de<br>2019;2019:e7096416.<br><br>(42)                                                                                                   |                                                                                                                   |                                                                                                                                                                                                      |        |                                                                                                                                      |             | chromatograph<br><br>y                                                                                                    |                      |
| 19(43) | Strazdiņa V,<br>Jemeljanovs A, Šterna V. Nutrition Value of Wild Animal Meat. Proc Latv Acad Sci Sect B Nat Exact Appl Sci. 31 de outubro de 2013;67(4-5):373-7. | Compare the nutritional value of the meat of different types of wild animals with analogous domesticated animals. | Wild meat samples had a higher content of proteins, essential fatty acids, iron and zinc compared to non-wild animals. The highest cholesterol levels were found in wild boar ( <i>Sus scrofa</i> ). | Latvia | Elk ( <i>Alces alces</i> ), Deer ( <i>Cervus elaphus</i> ), Wild boar ( <i>Sus scrofa</i> ), Roe deer ( <i>Capreolus capreolus</i> ) | 54 (muscle) | Proteins :<br>Method<br>Kjeldahl;<br>Lipids:<br>Method<br>Soxhlet -<br>AOAC 991.36;<br>Lipid<br>fractions: Gas-<br>liquid | Medium<br><br>(5.00) |

|    |                                                                                                                                                                                                          |                                                                                    |                                                                                                                                     |                                |                                                                                                         |            |                                                                                                                            |                  |
|----|----------------------------------------------------------------------------------------------------------------------------------------------------------------------------------------------------------|------------------------------------------------------------------------------------|-------------------------------------------------------------------------------------------------------------------------------------|--------------------------------|---------------------------------------------------------------------------------------------------------|------------|----------------------------------------------------------------------------------------------------------------------------|------------------|
|    |                                                                                                                                                                                                          |                                                                                    |                                                                                                                                     |                                |                                                                                                         |            | chromatograph<br>y; Cholesterol:<br>Colorimetric<br>Blur;<br>Minerals: ICP-<br>AES/ISO<br>6869-2002                        |                  |
| 20 | Zimmerman TJ, Jenks<br>JA, Leslie DM, Neiger<br>RD. Hepatic minerals<br>of white-tailed and<br>mule deer in the<br>southern Black Hills,<br>South Dakota. J Wildl<br>Dis. abril de<br>2008;44(2):341–50. | Assess hepatic<br>mineral<br>concentrations of<br>deer from different<br>habitats. | The liver mineral levels<br>found differed. The<br>differences were<br>associated with diet,<br>location and<br>reproductive stage. | United<br>States of<br>America | White-tailed deer<br>( <i>Odocoileus<br/>virginianus</i> ), Mule deer<br>( <i>Odocoileus hemionus</i> ) | 83 (liver) | Minerais: ICP-<br>AES Al, Sb,<br>As, Ba, B, Cd,<br>Ca, Cr, Co,<br>Cu, Fe, Pb,<br>Mg, Mn, Mo,<br>P, K, Se, Na,<br>S, Tl, Zn | Medium<br>(5.50) |

|        |                                                                                                                                                                                                                                                                          |                                                                                               |                                                                                                                                                                                       |                     |                                         |                    |                                                       |                    |
|--------|--------------------------------------------------------------------------------------------------------------------------------------------------------------------------------------------------------------------------------------------------------------------------|-----------------------------------------------------------------------------------------------|---------------------------------------------------------------------------------------------------------------------------------------------------------------------------------------|---------------------|-----------------------------------------|--------------------|-------------------------------------------------------|--------------------|
| 21(44) | <p>Webb EC, Ryssen JBJ van, Erasmus MEA, McCrindle CME.</p> <p>Copper, manganese, cobalt and selenium concentrations in liver samples from African buffalo (<i>Syncerus caffer</i>) in the Kruger National Park. J Environ Monit. 29 de novembro de 2001;3(6):583-5.</p> | <p>Evaluate the levels of micronutrients found in buffalo liver and in different regions.</p> | <p>The results demonstrated that there are significant differences in the amounts of micronutrients available in meat depending on the territory in which the buffalo is located.</p> | <p>South Africa</p> | <p>Buffalo (<i>Syncerus caffer</i>)</p> | <p>311 (liver)</p> | <p>Minerals: ICP-AES copper, manganese and cobalt</p> | <p>High (6.67)</p> |
|--------|--------------------------------------------------------------------------------------------------------------------------------------------------------------------------------------------------------------------------------------------------------------------------|-----------------------------------------------------------------------------------------------|---------------------------------------------------------------------------------------------------------------------------------------------------------------------------------------|---------------------|-----------------------------------------|--------------------|-------------------------------------------------------|--------------------|

### 309 **3.3 Quality Analysis**

310           During the quality analysis process, the agreement among the assessors was  
311 excellent (Fleiss' Kappa = 1.00). No articles were rated as low quality, and 72% received a score  
312 indicating high quality (> 6.0 points) (see Supplementary Material 5). The highest ratings were  
313 given for procedures used in sample processing, description of analysis methods, and  
314 presentation of results with measures such as standard deviation or standard error. On the other  
315 hand, the criteria where the articles scored lower pertain to the exclusion of the scientific name  
316 of the species, as well as the absence of information on conflicts of interest and sources of  
317 funding for the studies.

### 318 **3.4 General Comments on the Dataset**

319           In the topic of data imputation, the techniques that showed the lowest SMAPE values  
320 for each nutrient demonstrated less absolute error and greater consistency, and were therefore  
321 selected for imputing the data. SMAPE values ranged from approximately 11.06% (protein) to  
322 83.67% (selenium). For more details, see Supplementary Material 6.

### 323 **3.5 General Comments on the Nutritional Profile of the Meats**

324           All methods used in food composition analyses among the different studies are  
325 recognized by the AOAC (Association of Official Analytical Chemists), which supports the  
326 comparison of the obtained results (see Supplementary Material 7). The Supplementary  
327 Material 8 summarizes the mean and standard deviation values of the nutritional composition  
328 of wild animals included in this systematic review. Results of the statistical analyses are  
329 available in Supplementary Material 9.

330           Table 3 presents the main results, highlighting the pairs of comparisons where statistical  
331 differences were significant. We present the main results of this section by highlighting the

332 following findings: differences in the nutritional composition of muscles among classes of wild  
333 animals, differences in the nutritional composition of visceral meat from different classes of  
334 wild animals, and differences in nutritional composition between muscle and visceral meats,  
335 including a comparison of nutrient profiles between these anatomical parts of wild animals.

336 **Table 3.** Nutritional composition in muscle and viscera of wildmeat, comprising mammals, birds, and reptiles, including original and imputed data.

337 Pairs of comparisons with statistically significant differences are highlighted in black.

| <b>Nutrient</b> | <b>Mammal<br/>Viscera x<br/>Mammal<br/>Muscle</b> | <b>Mammal<br/>Viscera x Bird<br/>Muscle</b> | <b>Mammal<br/>Viscera x<br/>Reptile<br/>Viscera</b> | <b>Mammal<br/>Viscera x<br/>Reptile Muscle</b> | <b>Muscle<br/>Mammal x<br/>Muscle Bird</b> | <b>Mammal<br/>Muscle x<br/>Reptile<br/>Viscera</b> | <b>Mammal<br/>Muscle x<br/>Reptile Muscle</b> | <b>Bird muscle x<br/>Reptile<br/>Viscera</b> | <b>Bird Muscle x<br/>Reptile Muscle</b> | <b>Reptile<br/>Viscera x<br/>Reptile Muscle</b> |
|-----------------|---------------------------------------------------|---------------------------------------------|-----------------------------------------------------|------------------------------------------------|--------------------------------------------|----------------------------------------------------|-----------------------------------------------|----------------------------------------------|-----------------------------------------|-------------------------------------------------|
| Protein,<br>g   | 23.26 x 23.15<br>(>0.05)                          | 23.26 x 23.46<br>(>0.05)                    | 23.26 x 16.33<br>(<0.01)                            | 23.26 x 21.34<br>(<0.01)                       | 23.15 x 23.46<br>(>0.05)                   | 23.15 x 16.33<br>(<0.05)                           | 23.15 x 21.34<br>(>0.05)                      | 23.46 x 16.33<br>(<0.01)                     | 23.46 x 21.34<br>(<0.01)                | 16.33 x 21.34<br>(>0.05)                        |
| Fat, g          | 1.37 x 1.27<br>(>0.05)                            | 1.37 x 2.42<br>(<0.05)                      | 1.37 x 5.7<br>(<0.05)                               | 1.37 x 2.02<br>(>0.05)                         | 1.27 x 2.42<br>(<0.01)                     | 1.27 x 5.7<br>(<0.01)                              | 1.27 x 2.02<br>(>0.05)                        | 2.42 x 5.7<br>(>0.05)                        | 2.42 x 2.02<br>(<0.05)                  | 5.7 x 2.02<br>(<0.05)                           |
| w6, g           | 0.24 x 1.37<br>(<0.01)                            | 1.37 x 0.83<br>(>0.05)                      | 1.37 x 1.41<br>(>0.05)                              | 1.37 x 0.5<br>(<0.01)                          | 0.24 x 0.83<br>(<0.01)                     | 0.24 x 1.41<br>(<0.01)                             | 0.24 x 0.5<br>(>0.05)                         | 0.83 x 1.41<br>(>0.05)                       | 0.83 x 0.5<br>(>0.05)                   | 1.41 x 0.5<br>(>0.05)                           |
| Fe, mg          | 14.51 x 3.21<br>(<0.01)                           | 4.41 x 14.51<br>(<0.01)                     | 14.51 x 15.55<br>(>0.05)                            | 14.51 x 5.39<br>(<0.01)                        | 3.21 x 4.41<br>(>0.05)                     | 3.21 x 5.39<br>(<0.01)                             | 3.21 x 5.39<br>(<0.01)                        | 3.21 x 15.55<br>(<0.01)                      | 4.41 x 5.39<br>(>0.05)                  | 15.55 x 5.39<br>(<0.01)                         |
| K, g            | 0.13 x 0.21<br>(<0.05)                            | 0.13 x 0.27<br>(<0.01)                      | 0.13 x 0.06<br>(>0.05)                              | 0.13 x 0.21<br>(>0.05)                         | 0.21 x 0.27<br>(<0.01)                     | 0.21 x 0.06<br>(<0.05)                             | 0.21 x 0.21<br>(>0.05)                        | 0.27 x 0.06<br>(<0.01)                       | 0.27 x 0.21<br>(<0.05)                  | 0.06 x 0.21<br>(>0.05)                          |



|         |                              |                             |                              |                            |                             |                              |                              |                             |                             |                              |
|---------|------------------------------|-----------------------------|------------------------------|----------------------------|-----------------------------|------------------------------|------------------------------|-----------------------------|-----------------------------|------------------------------|
| Mn, mg  | 0.39 x 0.08<br>( $<0.01$ )   | 0.39 x 0.12<br>( $<0.01$ )  | 0.39 x 0.38<br>( $>0.05$ )   | 0.39 x 0.14<br>( $>0.05$ ) | 0.08 x 0.12<br>( $>0.05$ )  | 0.08 x 0.38<br>( $<0.01$ )   | 0.08 x 0.14<br>( $<0.01$ )   | 0.12 x 0.38<br>( $>0.05$ )  | 0.12 x 0.14<br>( $>0.05$ )  | 0.38 x 0.14<br>( $>0.05$ )   |
| Na, g   | 0.1 x 0.11<br>( $<0.01$ )    | 0.11 x 0.1<br>( $>0.05$ )   | 0.1 x 0.09<br>( $>0.05$ )    | 0.1 x 0.1<br>( $>0.05$ )   | 0.11 x 0.1<br>( $>0.05$ )   | 0.11 x 0.09<br>( $<0.05$ )   | 0.11 x 0.1<br>( $>0.05$ )    | 0.1 x 0.09<br>( $>0.05$ )   | 0.1 x 0.1<br>( $>0.05$ )    | 0.09 x 0.1<br>( $>0.05$ )    |
| Zn, mg  | 2.43 x 1.24<br>( $<0.01$ )   | 3.33 x 0.86<br>( $<0.01$ )  | 3.33 x 2.43<br>( $>0.05$ )   | 3.33 x 1.24<br>( $<0.01$ ) | 1.76 x 0.86<br>( $<0.01$ )  | 1.76 x 2.43<br>( $>0.05$ )   | 1.76 x 1.24<br>( $<0.01$ )   | 0.86 x 2.43<br>( $<0.01$ )  | 0.86 x 1.24<br>( $>0.05$ )  | 2.43 x 1.24<br>( $<0.01$ )   |
| Se, mcg | 57.19 x 10.61<br>( $<0.01$ ) | 57.19 x 3.45<br>( $<0.01$ ) | 57.19 x 81.17<br>( $>0.05$ ) | 3.33 x 1.24<br>( $<0.05$ ) | 10.61 x 3.45<br>( $>0.05$ ) | 10.61 x 81.17<br>( $>0.05$ ) | 10.61 x 19.37<br>( $>0.05$ ) | 3.45 x 81.17<br>( $<0.01$ ) | 3.45 x 19.37<br>( $<0.01$ ) | 81.17 x 19.37<br>( $>0.05$ ) |

338

339

340

341 **3.6 Nutritional comparison: Nutritional Variation in Muscles of Mammals, Birds, and**  
342 **Reptiles**

343 Our results demonstrate significant variations in the nutritional profile of meat  
344 depending on the analyzed class (mammal, bird, or reptile).

345 For reptiles, which were all aquatic species, their muscles showed over 60% higher  
346 concentrations of iron ( $p < 0.01$ ) and over 75% higher concentrations of manganese ( $p < 0.01$ )  
347 compared to mammals. Additionally, reptile muscles exhibited selenium concentrations that  
348 were over 400% higher than those in bird muscles ( $p < 0.01$ ) and nearly 60% higher fat  
349 concentrations than those in mammals.

350 Bird muscles stood out for having the highest concentrations of potassium  
351 compared to mammals ( $p < 0.01$ ) and reptiles ( $p < 0.05$ ). They also displayed elevated fat  
352 concentrations, which were over 90% higher than those found in mammal muscles ( $p < 0.01$ )  
353 and 20% higher than those in reptile muscles ( $p < 0.01$ ). Furthermore, birds showed the highest  
354 concentrations of omega-6, surpassing those in mammals by over 200% ( $p < 0.01$ ). There was  
355 no statistical difference in iron content between bird and mammal muscles; however, bird  
356 muscles had iron concentrations over 30% higher than those in mammals.

357 Mammal muscles exhibited the highest concentrations of zinc, with values over  
358 100% higher than those found in bird muscles ( $p < 0.01$ ) and over 40% higher than those  
359 recorded in reptile muscles ( $p < 0.01$ ). Mammals also had the lowest fat concentrations, nearly  
360 50% lower than in birds and almost 40% lower than in reptiles.

361 **3.7 Nutritional comparison: Nutritional Variation in Viscera of Mammals and Reptiles**

362                   When comparing the nutritional content of viscera meat, we found that mammalian  
363 viscera had the highest protein concentrations compared to reptiles ( $p < 0.01$ ). Conversely,  
364 reptilian viscera stood out for their high fat content, with concentrations over 300% higher than  
365 those found in mammals ( $p < 0.01$ ).

### 366 **3.8 Comparing Anatomical Parts: Nutritional Variation of Macro and Micronutrients in** 367 **Viscera and Muscle of Mammals and Reptiles**

368                   Regarding the animal parts, the most frequent variations in macronutrients were related  
369 to fat content. We found that reptilian viscera exhibited higher fat content (5.37 g), nearly  
370 double ( $p < 0.05$ ), and lower protein content (16.33 g) compared to muscle (2.02 g and 21.34  
371 g, respectively). In mammals, the difference was significant only for omega-6, with viscera  
372 (1.37 g) showing over 400% higher content than muscles (0.24 g) ( $p < 0.01$ ).

373                   Regarding minerals, viscera generally had higher concentrations compared to muscles.  
374 Reptilian viscera showed almost 300% more iron ( $p < 0.01$ ) and nearly 200% more zinc ( $p <$   
375  $0.01$ ) than their muscles. In mammals, viscera revealed iron and manganese concentrations over  
376 300% higher ( $p < 0.01$ ), selenium levels significantly higher ( $p < 0.01$ ), and zinc concentrations  
377 almost 90% higher ( $p < 0.01$ ) than those found in muscles. However, potassium content showed  
378 a different pattern, with muscle concentrations over 60% higher than those found in viscera ( $p$   
379  $< 0.01$ ).

## 380 **4. DISCUSSION**

381                   This study analyzes the nutritional composition patterns found in wild animal meat.  
382 Based on these findings, several important conclusions can be drawn: (i) wild animal meats  
383 represent significant sources of nutrients, which are often scarce in the diets of populations  
384 facing food insecurity; (ii) the viscera of these animals are particularly rich in minerals

385 compared to muscles, similar to what is observed in meats from domesticated animals; and (iii)  
386 the nutritional profile, especially in terms of micronutrients, varies among different classes of  
387 animals.

388         Considering the interclass variation in both viscera and muscles, it is important to note  
389 that, although variations were observed, it is not possible to determine from the available data  
390 whether these variations are attributable to intrinsic characteristics of the class or to individual  
391 or environmental factors influencing the composition.

#### 392 **4.1 Wildmeat as Source of Nutrients**

393         We compare the nutritional content of wildmeats with the DRI (Dietary Reference  
394 Intakes) to provide a reference for understanding the contribution of these wildmeats as a  
395 significant source of nutrients for people at different life stages (Supplementary Material 10).  
396 Wildmeats can be considered excellent sources of various nutrients. Analyses of the edible  
397 portions of muscles and viscera from these animals demonstrate their ability to provide high  
398 levels of proteins, as well as micronutrients such as iron, zinc, and selenium (see Supplementary  
399 Material 10). These elements are often deficient in the diets of vulnerable groups, such as  
400 women and children, particularly in IPLC contexts (45).

401         Nutritional deficiencies have significant health implications. Protein deficiency can lead  
402 to growth delays and induce hormonal and immunological changes (46). Iron deficiency is  
403 correlated with the development of anemia, (7) while zinc deficiency can lead to immune  
404 system dysregulation, compromised cognitive functions, growth deficits, and dermatological  
405 disorders (47). Selenium deficiency can compromise the effectiveness of immune system cells  
406 (48).

407         Our findings reveal that wild bird meat, in portions equivalent to a breast or thigh piece  
408 (100 g), can supply more than half of the daily iron needs for children and women, as well as

409 more than half of the protein needed for women and nearly double the amount needed for  
410 children. Meanwhile, mammal meats, in a portion like a medium steak (100 g), provide about  
411 half of the protein and 40% of the iron needed for both children and women. Additionally,  
412 organs such as the liver and heart are even richer, potentially exceeding 200% of children's iron  
413 and selenium needs. For reptiles, a portion of two small pieces of muscle (100 g) can meet over  
414 200% of children's iron needs and exceed 400% of their selenium needs. For women, the  
415 amounts of iron and selenium provided meet approximately 200% and 150% of their  
416 requirements, respectively.

417         These results highlight the potential of wild animal meats as sources of nutrients that  
418 are often deficient in the diets of populations facing food insecurity in developing countries.  
419 They contribute to improving dietary quality, making their consumption an important  
420 nutritional strategy for populations dependent on these resources (49). For this reason, either  
421 restricting access to wildmeats due to stringent conservation policies or defaunation of wild  
422 animal populations may have adverse nutritional impacts on these vulnerable human  
423 populations.

#### 424 **4.2 Viscera of Wild Animals are Important Reservoirs of Nutrients**

425         Our findings indicated that meats derived from viscera have a substantially different  
426 nutritional composition compared to those from muscles. Both mammalian and reptilian viscera  
427 stood out for their high concentrations of nutrients, surpassing muscular meats, particularly in  
428 terms of mineral content.

429         The composition of meat can vary considerably according to the anatomical part and  
430 tissue type of the animal (17). While meats derived from viscera are known for their high fat  
431 and micronutrient content, muscles are notable for their higher protein concentrations and lower  
432 levels of fat and micronutrients.

433           Despite variations in nutrient patterns between animal classes (reptiles and mammals),  
434 we observed that reptilian viscera demonstrated a pattern similar to that mentioned by, (17)  
435 with higher fat content, lower protein concentrations, and overall mineral concentrations nearly  
436 three times higher than in muscles. However, mammalian viscera, while exhibiting higher fat  
437 concentrations, particularly omega-6, and high concentrations of micronutrients, had protein  
438 concentrations similar to those found in muscles.

439           Furthermore, we observed a distinctive distribution of potassium compared to other  
440 minerals present in the viscera. Potassium concentrations in visceral meats were lower than in  
441 muscles for both reptiles and mammals. This disparity may be related to the physiological  
442 characteristics of these tissues, (17) as muscles require higher concentrations of potassium for  
443 muscle contraction.

444           Although wild animal viscera are important nutrient sources, we do not recommend  
445 promoting the preferential consumption of specific anatomical parts over others. Utilizing food  
446 holistically, a common practice among indigenous peoples and traditional communities,  
447 contributes to both sustainability, (45) and nutritional diversification through a  
448 complementarity mechanism (50). Furthermore, while viscera may contain high concentrations  
449 of certain nutrients, their proportion, both available and consumed, tends to be lower compared  
450 to other edible tissues of the animal.

451           Moreover, it is important to note that consuming viscera, despite being a rich source of  
452 essential nutrients, may pose risks due to higher levels of heavy metals compared to the muscles  
453 of animals. These levels can be higher in wild animal viscera and, in some cases, exceed  
454 recommended limits set by health organizations (51). Regular consumption of wildmeat can  
455 lead to a significant increase in exposure to heavy metals, such as cadmium and lead, in families

456 consuming these meats (51). Thus, one of the recommendations is to limit the consumption of  
457 viscera, such as liver, especially in children.

458         Some studies indicate that certain nutrients can mitigate the toxic effects of heavy metals  
459 through chelation. For example, a study conducted in the Brazilian Amazon, where the local  
460 population is exposed to a diet rich in selenium and heavy metals such as methylmercury,  
461 revealed that selenium plays a chelating role, (52) potentially mitigating the toxic effects of  
462 methylmercury. This finding underscores the complexity of nutritional and environmental  
463 interactions, highlighting the importance of considering socio-ecological contexts in nutritional  
464 recommendations. While high selenium intake can lead to toxicity, (53) the case of the  
465 Amazonian population illustrates how excessive consumption of certain nutrients, under certain  
466 conditions, can offer protective effects. This highlights the need for a nuanced approach in  
467 nutritional guidelines. Selenium was one of the nutrients found in higher concentrations in the  
468 organ meats of wild animals, with 100 g of reptile and mammal organ meats providing over  
469 100% of daily recommendations for children and adults.

### 470 **4.3 The Nutritional Composition of Wildmeat Varies Among Classes, Not Necessarily Due** 471 **to Animal Physiology Factors**

472         Our comparison of nutrient content in muscles among species revealed a notable  
473 predominance of potassium, fat, and omega-6 in birds compared to other animal classes. Wild  
474 birds assessed in this study showed an average fat content of less than 2.5%. Despite being  
475 higher than other classes, this is lower than expected for non-wild birds, which typically have  
476 fat concentrations around 5%, possibly due to variations in physical activity levels (54). Fat  
477 content can also vary considerably depending on the bird species; for example, ostriches  
478 generally have lower fat content compared to chickens (55).

479           However, the results obtained with the birds in this study are enlightening in  
480 demonstrating that variations in nutrients may not be directly related to the taxonomic class of  
481 the animal. We observed that the muscles of wild mammals do not have higher iron  
482 concentrations compared to those of wild birds, indicated by a lack of statistically significant  
483 difference, a finding that differs from the pattern observed in domesticated animals (10). Based  
484 on these findings, we propose two hypotheses to explain the high concentrations of iron and  
485 other micronutrients in the meat of wild birds: (i) the distinct anatomy of birds and their  
486 migratory lifestyle, and (ii) the slaughter method to which free-ranging birds are subjected.

487           Within bird species, physiological characteristics associated with flight capability  
488 influence the nutritional profile of their meat. For flight, birds primarily use the pectoral  
489 muscles, responsible for wing movement (56). The continuous use of these muscles at high  
490 frequencies requires a high energy cost, leading to physiological adaptations to sustain  
491 prolonged flights (56). During migration periods, wild birds exhibit a significant increase in  
492 pectoral muscle mass and metabolic rates to sustain flight, allowing them to go long periods  
493 without feeding or drinking, primarily relying on fat oxidation for energy (57). This can also  
494 affect the low fat concentrations in their meats.

495           When comparing nutrient content in the breast and thigh meat of migratory wild birds,  
496 breast muscle has nearly double the iron content found in thigh meat, (13) In contrast,  
497 domesticated birds like turkey have lower iron concentrations in breast meat compared to thigh  
498 meat. For example, 100 g of turkey breast meat contains approximately 0.73 mg of iron,  
499 whereas the thigh contains 1.57 mg per 100g, (10) demonstrating a different nutrient profile  
500 compared to migratory wild birds.

501           The high iron concentration in wild bird meat may also be attributed to the slaughter  
502 method used. Typically, wild birds are shot in the chest, a highly vascularized area near nutrient-



503 rich organs such as the liver and heart (13). This process can cause the leakage of visceral  
504 contents, increasing nutrient content, including iron, in the muscle tissues. The evidence  
505 presented on bird behavior and slaughter methods suggests that variations in nutrient levels may  
506 not be directly related to the animal's taxonomic class.

507           The anatomy and migratory behavior of wild birds permits them to have a more  
508 diverse diet, directly influencing the nutritional composition of their meat (13). We can assume  
509 that birds primarily consuming seeds and oilseeds, which are naturally rich in fats, omegas, and  
510 minerals, (10) tend to have meat that is richer in these nutrients. In contrast, carnivorous and  
511 omnivorous birds have a distinct nutritional profile. These characteristics differ significantly  
512 from domesticated birds, which are raised in confinement and tend to feed mainly on  
513 agricultural feeds designed for rapid growth (58). Over time, soils used for conventional food  
514 production can experience nutritional imbalances and low fertility, especially in terms of  
515 micronutrients such as iron, zinc, and manganese (59). Consequently, food produced in  
516 conventional systems tends to have lower concentrations of these micronutrients, reflected in  
517 lower levels in domesticated bird meats.

518           Regarding reptiles, a significant finding was the high concentration of selenium in  
519 their muscles and viscera, much higher than those observed in birds and mammals. These  
520 findings may be linked to the physiological characteristics of reptiles, which have the ability to  
521 absorb nutrients not only from their diets but also directly from their surrounding aquatic  
522 environment (60). Reptiles can take in trace elements through their skin and other permeable  
523 membranes while submerged in water. This dual absorption mechanism contributes to the  
524 significant presence of trace elements, such as selenium, in their meat (60).

525           The reptiles analyzed in this study are aquatic and were collected mainly in the  
526 Brazilian Amazon, known for significant variations in soil and water composition, influenced

527 by different organic matter and soil biota, both geographically (e.g. white, black and transparent  
528 rivers) and between dry and rainy periods (61). This region is known for high selenium  
529 concentrations in the soil, which play a crucial role in its absorption by local foods and water  
530 bodies. For example, Amazonian soils are responsible for the abundant production of Brazil  
531 nuts (*Bertholletia excelsa*), a significant source of selenium. Studies show considerable  
532 variations in selenium content in these nuts across different Amazonian regions, suggesting  
533 significant environmental influence on their concentration. These findings have important  
534 implications for understanding the nutritional composition of reptile meat, as selenium may be  
535 influenced by the diet of these animals in the Amazon region (62).

536 Our results demonstrated that wild mammals exhibited the highest concentrations of  
537 zinc compared to other animal classes, along with elevated levels of iron and potassium. These  
538 findings are consistent with, (26) who investigated wild deer meat and found that potassium,  
539 zinc, and iron were the most abundant nutrients. However, the content of these nutrients can  
540 vary within species depending on the animal's life cycle. For instance, male deer may  
541 experience cyclic physiological osteoporosis related to rapid antler growth, decreasing zinc  
542 content in the bloodstream and consequently in all other body tissues (26). The results of this  
543 study highlight significant variations in the nutritional composition of meat not only between  
544 different classes of animals but also among species within the same class.

545 Finally, it is important to note that ecosystems vary considerably between countries, and  
546 the wide variations in nutritional profiles are also associated with the specificities from which  
547 these species were collected. The study encompassed nutritional composition data from 26  
548 animal species, originating from 11 different countries. For this reason, nutrient content in these  
549 meats is subject to various factors, as nutrient distribution in the region varies significantly  
550 according to soil and water type and collection area (59).

551           Therefore, in our findings, birds stood out for their high concentrations of potassium,  
552 lipids, and omega-6 fatty acids, while reptiles exhibited exceptionally high levels of selenium,  
553 likely influenced by selenium-rich environments such as the Amazon. Wild mammals, on the  
554 other hand, distinguished themselves with high concentrations of zinc, iron, and potassium.  
555 These findings suggest that while physiological and metabolic factors may play a role, the  
556 nutritional composition of meat is strongly shaped by environmental factors such as diet and  
557 habitat. Therefore, it is important to consider these nuances when evaluating the nutritional  
558 value of meat from different species, rather than relying solely on taxonomic classifications.

559

#### 560 **4.4 Novelty of the Research**

561           To the best of our knowledge, this is the first study to compile and analyze data  
562 concerning a large number of distinct species spanning three different classes in a single  
563 analysis. Notably, we have also introduced the technique of data imputation, presumably for  
564 the first time in the field of nutritional analysis of wildmeat. While data imputation has been  
565 previously employed in areas such as metabolomics for nutritional analyses? (63) its application  
566 in this context is innovative. Additionally, during our investigation, we identified a lack of  
567 appropriate tools to assess the methodological quality of research related to the nutritional  
568 composition of wild animals. Specific ethical and legal considerations in this field exacerbate  
569 this need. To address this limitation, we developed our own quality questionnaire (see  
570 Supplementary Material 2), which assisted us in evaluating the quality of the studies included  
571 in the review, considering the complexity of the resource in question.

572           Several limitations were encountered during the development of this study. One major  
573 challenge was the lack of access to original data from the reviewed articles, which may have  
574 compromised our ability to capture data variability. Additionally, the lack of specific

575 information on covariates impacting composition in the analyzed studies limited our ability to  
576 adjust for these elements during tests and conduct subgroup analyses, preventing us from  
577 conducting a traditional meta-analysis. Furthermore, the small sample size of reptile meats  
578 demands caution in interpreting results related to this group.

579 We also observed high SMAPE (Symmetric Mean Absolute Percentage Error) values  
580 for certain nutrients, indicating reduced quality in the predictions considering the available data.  
581 This suggests the need for caution in interpreting these results. Despite this, we proceeded with  
582 the imputation process based on three main grounds: (1) the potential for significant natural  
583 variability, especially concerning wildmeats; (2) the scarcity of available data for this specific  
584 type of resource, which inherently may contribute to greater uncertainty in the forecasts made;  
585 and (3) relevant ethical considerations, including the difficulties associated with obtaining wild  
586 meat samples.

587 Despite these limitations, our research provides a detailed analysis of nutritional  
588 patterns in wild animals, which can underpin and guide future investigations in this field. The  
589 data obtained could assist in formulating more precise hypotheses, such as the impact of  
590 different slaughter methods on iron content in birds or the influence of the environment on  
591 selenium content in reptiles. Furthermore, we emphasize the importance for researchers,  
592 especially those focused on wildlife management, to enrich their databases with detailed  
593 information on variables influencing nutritional composition. This would allow for more  
594 comprehensive analyses, enhancing wildlife conservation efforts and maximizing the benefits  
595 derived from these resources, especially for IPLC.

## 596 **5. CONCLUSION**

597 Wildmeat play a crucial role as nutrient sources for diverse human populations. Findings  
598 from this study reveal significant nutrient variations among different animal classes and

599 anatomical parts, underscoring the ability of game meat to provide essential nutrients,  
600 especially micronutrients often deficient in the diets of vulnerable groups such as children and  
601 women of childbearing age who are particularly susceptible to the effects of malnutrition.  
602 Moreover, this study introduces the use of data imputation methodology as an alternative to  
603 navigating scarcity of data on wild foods. However, it is important to note that current primary  
604 data limitations hinder the precise determination of whether these differences are due to  
605 inherent characteristics of animal classes or to individual and environmental factors affecting  
606 nutritional composition. Future research that directly analyzes the nutritional composition of  
607 wildmeat is needed to clarify the causes of these variations.

608

609

610

## 611 REFERENCES

612

- 613 1. Ingram DJ, Coad L, Milner-Gulland EJ, Parry L, Wilkie D, Bakarr MI, et al. Wild Meat Is  
614 Still on the Menu: Progress in Wild Meat Research, Policy, and Practice from 2002 to  
615 2020. *Annu Rev Environ Resour.* 2021;46(Volume 46, 2021):221–54.
- 616 2. Cawthorn DM, Hoffman LC. The bushmeat and food security nexus: A global account of  
617 the contributions, conundrums and ethical collisions. *Food Res Int.* 1º de outubro de  
618 2015;76:906–25.
- 619 3. Fa JE, Olivero J, Real R, Farfán MA, Márquez AL, Vargas JM, et al. Disentangling the  
620 relative effects of bushmeat availability on human nutrition in central Africa. *Sci Rep.* 2  
621 de fevereiro de 2015;5(1):8168.
- 622 4. Friant S, Ayambem WA, Alobi AO, Ifebueme NM, Otukpa OM, Ogar DA, et al. Eating  
623 Bushmeat Improves Food Security in a Biodiversity and Infectious Disease “Hotspot”.  
624 *EcoHealth.* março de 2020;17(1):125–38.
- 625 5. Nielsen MR, Meilby H, Smith-Hall C, Pouliot M, Treue T. The Importance of Wild Meat  
626 in the Global South. *Ecol Econ.* 1º de abril de 2018;146:696–705.
- 627 6. Nasi R, Brown, D, Wilkie D, Bennett E, Tutin C, van Tol G, et al. Conservation and use  
628 of wildlife-based resources: the bushmeat crisis. Montreal: Secretariat of the Convention  
629 on Biological Diversity; 2008. 50 p. (CBD technical series).
- 630 7. Torres PC, Morsello C, Orellana JDY, Almeida O, de Moraes A, Chacón-Montalván EA,  
631 et al. Wildmeat consumption and child health in Amazonia. *Sci Rep.* 6 de abril de  
632 2022;12(1):5213.

- 633 8. Golden CD, Fernald LCH, Brashares JS, Rasolofoniaina BJR, Kremen C. Benefits of  
634 wildlife consumption to child nutrition in a biodiversity hotspot. *Proc Natl Acad Sci U S*  
635 *A*. 6 de dezembro de 2011;108(49):19653–6.
- 636 9. Dannenberger D, Nuernberg G, Nuernberg K, Hagemann E. The effects of gender, age  
637 and region on macro- and micronutrient contents and fatty acid profiles in the muscles of  
638 roe deer and wild boar in Mecklenburg-Western Pomerania (Germany). *Meat Sci*. 1º de  
639 maio de 2013;94(1):39–46.
- 640 10. TBCA. TBCA - Tabela Brasileira de Composição de Alimentos. [Internet]. 2023 [citado  
641 19 de julho de 2023]. Disponível em: [http://www.tbca.net.br/base-](http://www.tbca.net.br/base-dados/composicao_alimentos.php)  
642 [dados/composicao\\_alimentos.php](http://www.tbca.net.br/base-dados/composicao_alimentos.php)
- 643 11. Masson L. [LATINFOODS and its role in the generation and compilation of data for  
644 Latin America]. *Arch Latinoam Nutr*. setembro de 1999;49(3 Suppl 1):89S-91S.
- 645 12. Jacob MCM, Feitosa IS, Albuquerque UP. Animal-based food systems are unsafe: severe  
646 acute respiratory syndrome coronavirus 2 (SARS-CoV-2) fosters the debate on meat  
647 consumption. *Public Health Nutr*. dezembro de 2020;23(17):3250–5.
- 648 13. Sevillano-Caño J, Cámara-Martos F, Aguilar-Luque EM, Cejudo-Gómez M, Moreno-  
649 Ortega A, Sevillano-Morales JS. Trace Element Concentrations in Migratory Game Bird  
650 Meat: Contribution to Reference Intakes Through a Probabilistic Assessment. *Biol Trace*  
651 *Elem Res*. 1º de outubro de 2020;197(2):651–9.
- 652 14. Zimmerman TJ, Jenks JA, Leslie DM, Neiger RD. Hepatic minerals of white-tailed and  
653 mule deer in the southern Black Hills, South Dakota. *J Wildl Dis*. abril de  
654 2008;44(2):341–50.
- 655 15. Rizvi STH, Latif MY, Amin MS, Telmoudi AJ, Shah NA. Analysis of Machine Learning  
656 Based Imputation of Missing Data. *Cybern Syst*. 2023;0(0):1–15.
- 657 16. Soulsbury CD, Gray HE, Smith LM, Braithwaite V, Cotter SC, Elwood RW, et al. The  
658 welfare and ethics of research involving wild animals: A primer. *Methods Ecol Evol*.  
659 2020;11(10):1164–81.
- 660 17. Damodaran SD, Parkin KL. *Química de Alimentos de Fennema*. 5º ed. Artmed; 2018.
- 661 18. Moher D, Liberati A, Tetzlaff J, Altman DG. Preferred Reporting Items for Systematic  
662 Reviews and Meta-Analyses: The PRISMA Statement. *Ann Intern Med*. 18 de agosto de  
663 2009;151(4):264–9.
- 664 19. Hayward MW, Callen A, Allen BL, Ballard G, Broekhuis F, Bugir C, et al.  
665 Deconstructing compassionate conservation. *Conserv Biol*. 2019;33(4):760–8.
- 666 20. Memon S, Wamala R, Kabano IH. A Comparison of Imputation Methods for Categorical  
667 Data [Internet]. Rochester, NY; 2023 [citado 6 de março de 2024]. Disponível em:  
668 <https://papers.ssrn.com/abstract=4574180>
- 669 21. Rubin DB. Discussion on Multiple Imputation. *Int Stat Rev Rev Int Stat*. 2003;71(3):619–  
670 25.
- 671 22. Myers WR. Handling Missing Data in Clinical Trials: An Overview. *Drug Inf J*. abril de  
672 2000;34(2):525–33.
- 673 23. Padovani RM, Amaya-Farfán J, Colugnati FAB, Domene SMÁ. Dietary reference  
674 intakes: aplicabilidade das tabelas em estudos nutricionais. *Rev Nutr*. dezembro de  
675 2006;19(6):741–60.
- 676 24. Jacob. [eliasjacob/paper\\_nutritional\\_composition\\_wildmeat](https://github.com/eliasjacob/paper_nutritional_composition_wildmeat) [Internet]. 2024. Disponível  
677 em: [https://github.com/eliasjacob/paper\\_nutritional\\_composition\\_wildmeat](https://github.com/eliasjacob/paper_nutritional_composition_wildmeat)
- 678 25. Roça R de O. *COMPOSIÇÃO QUÍMICA DA CARNE*. 2012;
- 679 26. Serrano MP, Maggiolino A, Landete-Castillejos T, Pateiro M, Barbería JP, Fierro Y, et al.  
680 Quality of main types of hunted red deer meat obtained in Spain compared to farmed  
681 venison from New Zealand. *Sci Rep*. 22 de julho de 2020;10(1):12157.
- 682 27. Soriano A, Murillo P, Perales M, Sánchez-García C, Murillo JA, García Ruiz A.

- 683 Nutritional quality of wild Iberian red deer (*Cervus elaphus hispanicus*) meat: Effects of  
684 sex and hunting period. *Meat Sci.* 1º de outubro de 2020;168:108189.
- 685 28. Madeira LA. MORFOLOGIA DAS FIBRAS MUSCULARES ESQUELÉTICAS DE  
686 FRANGOS DE CORTE CRIADOS NOS SISTEMAS CONFINADO E SEMI-  
687 CONFINADO [Internet]. 2005. Disponível em:  
688 [https://repositorio.unesp.br/bitstream/handle/11449/95316/madeira\\_la\\_me\\_botfmvz.pdf?s](https://repositorio.unesp.br/bitstream/handle/11449/95316/madeira_la_me_botfmvz.pdf?squence=1)  
689 [equence=1](https://repositorio.unesp.br/bitstream/handle/11449/95316/madeira_la_me_botfmvz.pdf?squence=1)
- 690 29. Aguiar JPL. Tabela de composição de alimentos da Amazônia. *ACTA AMAZONICA* 26.  
691 1996;121–6.
- 692 30. Amici A, Cifuni GF, Contò M, Esposito L, Failla S. Hunting area affects chemical and  
693 physical characteristics and fatty acid composition of wild boar (*Sus scrofa*) meat.  
694 *Rendiconti Lincei.* 1º de novembro de 2015;26(3):527–34.
- 695 31. Milczarek A, Janocha A, Niedziałek G, Zowczak-Romanowicz M, Horoszewicz E,  
696 Piotrowski S. Health-Promoting Properties of the Wild-Harvested Meat of Roe Deer  
697 (*Capreolus capreolus* L.) and Red Deer (*Cervus elaphus* L.) [Internet]. 2021 [citado 5 de  
698 setembro de 2024]. Disponível em: <https://www.mdpi.com/2076-2615/11/7/2108>
- 699 32. Fernandes HR, Deliza R, Neto OC, Silva CM, Albuquerque NI de, Martins TR, et al.  
700 Effect of high hydrostatic pressure on the meat of collared peccaries (*Tayassu tajacu*) with  
701 different ages. *Afr J Food Sci.* 30 de setembro de 2022;16(9):215–25.
- 702 33. Gálvez C. H, Arbaiza T, Carcelén C. F, Lucas A. O. *Revista de Investigaciones*  
703 *Veterinarias del Perú.* 1999 [citado 5 de setembro de 2024]. VALOR NUTRITIVO DE  
704 LAS CARNES DE SAJINO (*Tayassu tajacu*), VENADO COLORADO (*Mazama*  
705 *americana*), MAJAZ (*Agouti paca*) Y MOTELO (*Geochelone denticulata*). Disponível  
706 em: <https://revistasinvestigacion.unmsm.edu.pe/index.php/veterinaria/article/view/6707>
- 707 34. Jarzyńska G, Falandysz J. Selenium and 17 other largely essential and toxic metals in  
708 muscle and organ meats of Red Deer (*Cervus elaphus*) — Consequences to human health.  
709 *Environ Int.* 1º de julho de 2011;37(5):882–8.
- 710 35. Johnson HE, Bleich VC, Krausman PR. Mineral deficiencies in tule elk, Owens Valley,  
711 California. *J Wildl Dis.* janeiro de 2007;43(1):61–74.
- 712 36. Lima AT. Caracterização Físico Química da Tartaruda da Amazônia de água proveniente  
713 de cativeiro e de habitat natural do estado do Amazonas. Universidade Federal do  
714 Amazonas; 2009.
- 715 37. Lorenzo JM, Maggolino A, Gallego L, Pateiro M, Serrano MP, Domínguez R, et al.  
716 Effect of age on nutritional properties of Iberian wild red deer meat - *Journal of the*  
717 *Science of Food and Agriculture* [Internet]. 2019 [citado 5 de setembro de 2024].  
718 Disponível em: <https://scijournals.onlinelibrary.wiley.com/doi/abs/10.1002/jsfa.9334>
- 719 38. Rudman M, Leslie AJ, van der Rijst M, Hoffman LC. Quality characteristics of Warthog  
720 (*Phacochoerus africanus*) meat. *Meat Sci.* 1º de novembro de 2018;145:266–72.
- 721 39. Neto JV, Bressan MC, Faria PB, Vieira JO e, Santana MTA, Kloster M. Composição  
722 centesimal e colesterol da carne de jacaré-do-pantanal (*Caiman yacare* Daudin 1802)  
723 oriundo de zoológico e habitat natural. *Ciênc E Agrotecnologia.* agosto de  
724 2006;30:701–6.
- 725 40. Landi N, Ragucci S, Di Giuseppe AM, Russo R, Poerio E, Severino V, et al. Nutritional  
726 profiling of Eurasian woodcock meat: chemical composition and myoglobin  
727 characterization. *J Sci Food Agric.* 2018;98(13):5120–8.
- 728 41. Pérez-Peña PE, Riveros-Montalván MS, Vargas-Arana G, Soria FD, Chumbe JV, Baca  
729 YB. Consumo, microbiología y bromatología de la carne silvestre durante la COVID-19  
730 en Iquitos, Perú. *Cienc Amaz Iquitos.* 2021;9(2):51–68.
- 731 42. Spiegelhaar N, Martin ID, Tsuji LJS. Indigenous Subarctic Food Systems in Transition:  
732 Amino Acid Composition (Including Tryptophan) in Wild-Harvested and Processed

- 733 Meats. *Int J Food Sci.* 27 de junho de 2019;2019:e7096416.
- 734 43. Strazdiņa V, Jemeljanovs A, Šterna V. Nutrition Value of Wild Animal Meat. *Proc Latv*  
735 *Acad Sci Sect B Nat Exact Appl Sci.* 31 de outubro de 2013;67(4–5):373–7.
- 736 44. Webb EC, Ryssen JBJ van, Erasmus MEA, McCrindle CME. Copper, manganese, cobalt  
737 and selenium concentrations in liver samples from African buffalo (*Syncerus caffer*) in  
738 the Kruger National Park. *J Environ Monit.* 29 de novembro de 2001;3(6):583–5.
- 739 45. Lemke S, Delormier T. Indigenous Peoples’ food systems, nutrition, and gender:  
740 Conceptual and methodological considerations. *Matern Child Nutr.* novembro de 2017;13  
741 *Suppl 3(Suppl 3):e12499.*
- 742 46. Malafaia G, Martins RF, Silva ME. 4 - AVALIAÇÃO DOS EFEITOS DA  
743 DEFICIÊNCIA PROTEICA. 2009;4.
- 744 47. Pedraza DF, Sales MC. Estudos realizados no Brasil sobre a deficiência e a  
745 suplementação de zinco: ênfase em crianças. *Rev Bras Saúde Materno Infant.* junho de  
746 2017;17:217–32.
- 747 48. Cominetti C, Cozzolino SMF. Funções Plenamente Reconhecidas de Nutrientes Selênio.  
748 2009; Disponível em: [https://nutritotal.com.br/pro/wp-](https://nutritotal.com.br/pro/wp-content/uploads/2019/03/Fun%C3%A7%C3%B5es_Sele%C3%A7%C3%A3o.pdf)  
749 [content/uploads/2019/03/Fun%C3%A7%C3%B5es\\_Sele%C3%A7%C3%A3o.pdf](https://nutritotal.com.br/pro/wp-content/uploads/2019/03/Fun%C3%A7%C3%B5es_Sele%C3%A7%C3%A3o.pdf)
- 750 49. Jacob MCM, Feitosa IS, Albuquerque UP. Animal-based food systems are unsafe: severe  
751 acute respiratory syndrome coronavirus 2 (SARS-CoV-2) fosters the debate on meat  
752 consumption. *Public Health Nutr.* dezembro de 2020;23(17):3250–5.
- 753 50. DeClerck FAJ, Fanzo J, Palm C, Remans R. Ecological approaches to human nutrition.  
754 *Food Nutr Bull.* março de 2011;32(1 Suppl):S41-50.
- 755 51. Danieli PP, Serrani F, Primi R, Ponzetta MP, Ronchi B, Amici A. Cadmium, lead, and  
756 chromium in large game: a local-scale exposure assessment for hunters consuming meat  
757 and liver of wild boar. *Arch Environ Contam Toxicol.* novembro de 2012;63(4):612–27.
- 758 52. Marco KCD. Avaliação da exposição ao metilmercúrio e dieta rica em selênio sobre os  
759 níveis de óxido nítrico na população da região amazônica [Internet] [Mestrado em  
760 Toxicologia]. [Ribeirão Preto]: Universidade de São Paulo; 2007 [citado 5 de março de  
761 2024]. Disponível em: [http://www.teses.usp.br/teses/disponiveis/60/60134/tde-25072007-](http://www.teses.usp.br/teses/disponiveis/60/60134/tde-25072007-105904/)  
762 [105904/](http://www.teses.usp.br/teses/disponiveis/60/60134/tde-25072007-105904/)
- 763 53. Whiting P, Rutjes AW, Reitsma JB, Bossuyt PM, Kleijnen J. The development of  
764 QUADAS: a tool for the quality assessment of studies of diagnostic accuracy included in  
765 systematic reviews. *BMC Med Res Methodol.* 10 de novembro de 2003;3(1):25.
- 766 54. Abreu ARC. NÍVEIS DE PROTEÍNA E AMINOÁCIDOS EM DIETAS PARA  
767 FRANGOS DE CORTE FÊMEAS ABATIDOS EM DIFERENTES IDADES. 2019;  
768 Disponível em:  
769 <https://repositorio.ufmg.br/bitstream/1843/31571/1/TESE%20COMPLETA%20.pdf>
- 770 55. Feijó MB da S, Jacob S do C, Mano SB, Fernandes ML, Moraes ML de. Composição  
771 Centesimal e Perfil de Minerais da Carne de Avestruz (*Struthio Camellus*). *Rev Assoc*  
772 *Bras Nutr - RASBRAN.* 2009;(1):28–34.
- 773 56. Cao T, Jin JP. Evolution of Flight Muscle Contractility and Energetic Efficiency. *Front*  
774 *Physiol* [Internet]. 9 de outubro de 2020 [citado 22 de maio de 2024];11. Disponível em:  
775 <https://www.frontiersin.org/journals/physiology/articles/10.3389/fphys.2020.01038/full>
- 776 57. Price ER, Bauchinger U, Zajac DM, Cerasale DJ, McFarlan JT, Gerson AR, et al.  
777 Migration- and exercise-induced changes to flight muscle size in migratory birds and  
778 association with IGF1 and myostatin mRNA expression. *J Exp Biol.* 1º de setembro de  
779 2011;214(17):2823–31.
- 780 58. Rodrigues R, Pinto LCG, Crestana S, Pires AK. Ministério da Agricultura, Pecuária e  
781 Abastecimento. 2006;
- 782 59. Oliveira IP, Kluthcouski J, Fancelli AL, Neto DD. CONCENTRAÇÕES RESIDUAIS DE



- 783 COBRE, FERRO, MANGANÊS E ZINCO EM LATOSSOLO ROXO EUTRÓFICO  
784 SOB DIFERENTES TIPOS DE MANEJO. 2001;
- 785 60. Gaspar A, Silva TJP. Composição nutricional da carne da tartaruga-da-Amazônia  
786 (Podocnemis expansa) criada em cativeiro e em idade de abate. São Paulo. 2009;
- 787 61. Ferreira SJF, Luizão FJ, Miranda SÁF, Silva M do SR da, Vital ART. Nutrientes na  
788 solução do solo em floresta de terra firme na Amazônia Central submetida à extração  
789 seletiva de madeira<A HREF="#nt1"></A>; Acta Amaz. março de  
790 2006;36:59–67.
- 791 62. Silva Jr EC da. SELÊNIO NA CASTANHA-DO-BRASIL (Bertholletia excelsa) E EM  
792 SOLOS DA REGIÃO AMAZÔNICA BRASILEIRA [Internet]. Universidade Federal de  
793 Lavras; 2016. Disponível em:  
794 [http://repositorio.ufla.br/jspui/bitstream/1/11520/1/DISSERTA%  
798 c3%87%c3%83O\\_Sel%  
799 c3%aanio%20na%20castanha-do-  
800 brasil%20%28Bertholletia%20excelsa%29%20e%20em%20solos%20da%20regi%c3%a3  
o%20Amaz%c3%b4nica%20Brasileira.pdf](http://repositorio.ufla.br/jspui/bitstream/1/11520/1/DISSERTA%c3%87%c3%83O_Sel%<br/>795 c3%aanio%20na%20castanha-do-<br/>796 brasil%20%28Bertholletia%20excelsa%29%20e%20em%20solos%20da%20regi%c3%a3<br/>797 o%20Amaz%c3%b4nica%20Brasileira.pdf)
63. Wei R, Wang J, Su M, Jia E, Chen S, Chen T, et al. Missing Value Imputation Approach  
for Mass Spectrometry-based Metabolomics Data. Sci Rep. 12 de janeiro de  
2018;8(1):663.

801



# Variation in Nutritional Composition of Anatomical Parts and Taxonomic Classes of Wild Animals: A Systematic Review Using Data Imputation with Artificial Intelligence.

## Context

- The meat of wild animals is crucial for the food security of indigenous peoples and traditional communities.
- Currently, information on the nutritional profile of these foods is scarce.

## Methodology

- This study is a systematic review.
- Evaluated the influence of the anatomical part and taxonomic class on the nutritional composition of meat.
- We employed artificial intelligence techniques (SMAPE).

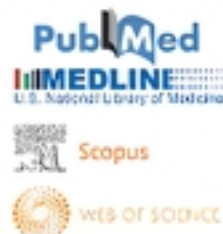

**Animal Icons: Mammals** (🐷),  
**Birds** (🐦), **Reptiles** (🐍)

**Anatomical Parts: Viscera vs.  
Muscles**

## Results

It analyzed 26 different species of animals (13 mammal species, 6 bird species, and 7 reptile species) from 11 different countries.

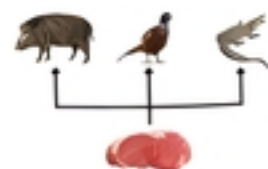

### Viscera vs. Muscles:

- 🐦 : the viscera have higher levels of **lipid** and **Fe**.
- 🐷 : the viscera have higher levels of **omega-6**, **Se**, **Fe**, **Mn**, and **Zn**.

### Differences between species:

- 🐦 : higher **lipid** levels.
- 🐷 : higher **Zn** levels.
- 🐍 : higher **Se** levels.

## Conclusion

Wild meat is an important source of nutrients due to its rich nutritional value. This study is innovative and fills a gap by providing a comprehensive nutritional profile of bushmeat, introducing a methodology to deal with missing data, offering an analytical solution that addresses data scarcity while considering ethical and legal dilemmas in the analysis of wildlife.

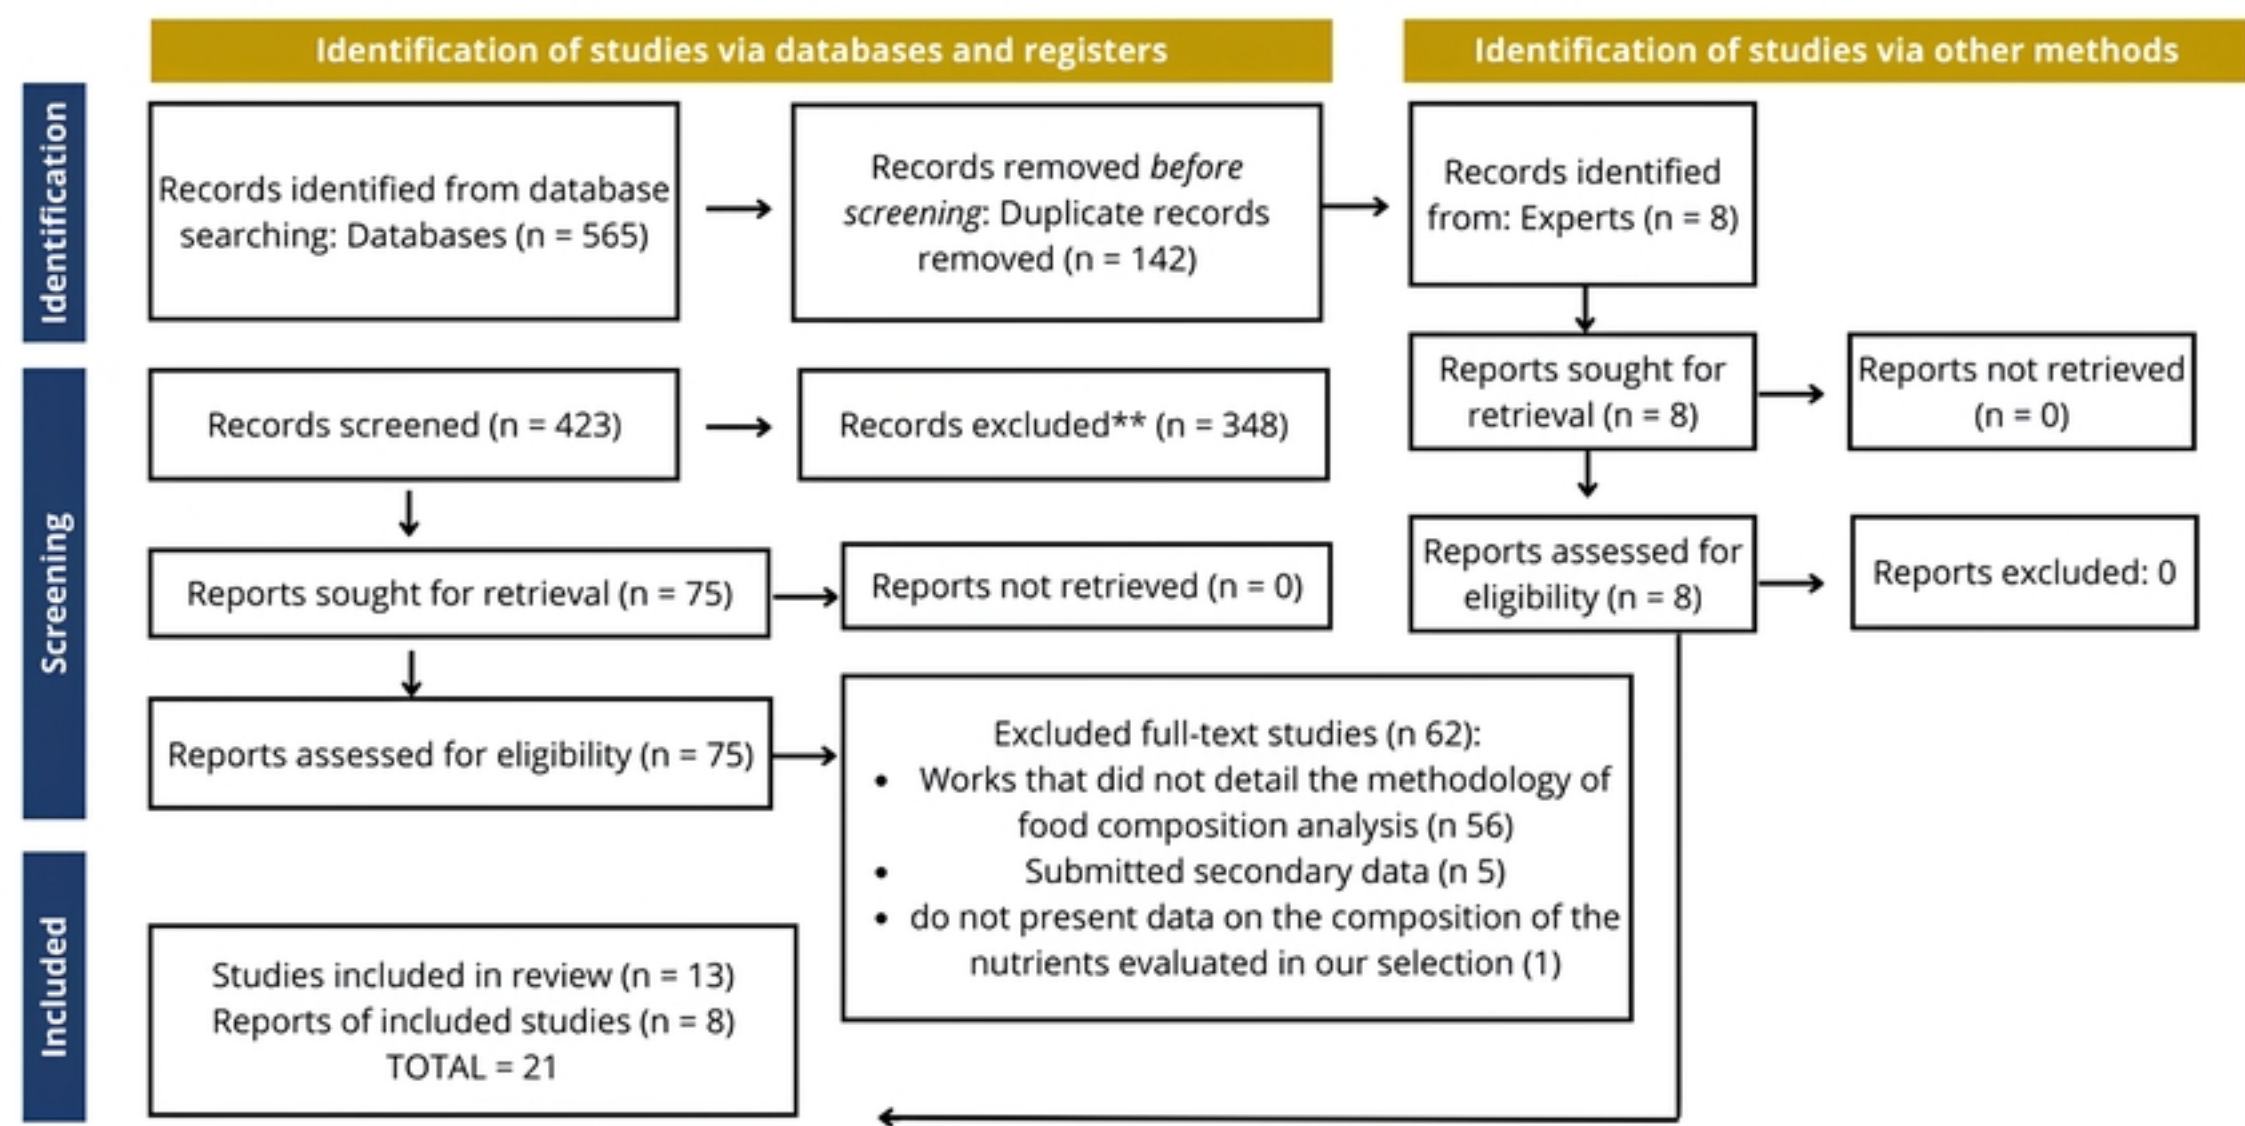

\*Consider, if feasible to do so, reporting the number of records identified from each database or register searched (rather than the total number across all databases/register).

\*\*If automation tools were used, indicate how many records were excluded by a human and how many were excluded by automation tools.

From: Page MJ, McKenzie JE, Bossuyt PM, Boutron I, Hoffmann TC, Mulrow CD, et al. The PRISMA 2020 statement: an updated guideline for reporting systematic reviews. *BMJ* 2021;372:n71. doi: 10.1136/bmj.n71. For more information, visit: <http://www.prisma-statement.org/>

Figure 1. Flowchart of the study selection process.
